# Supplementary material for: New Multi-Targeted Antiproliferative Agents: Design and Synthesis of IC261-Based Oxindoles as Potential Tubulin, CK1 and EGFR Inhibitors
Source: MDPI journal article supplement (doi:10.3390/ph14111114), 2021-10-30
Supplement: s1 [file s1]

## List of contents

| Ser. | Content                                                                                               | Page no. |
|------|-------------------------------------------------------------------------------------------------------|----------|
| 1    | <b>Figure S1.</b> LC/MS spectrum of compound <b>3b</b> .                                              | 5        |
| 2    | <b>Figure S2.</b> $^1\text{H}$ -NMR spectrum of compound <b>4b</b> in DMSO- <i>d</i> 6 at 400MHz.     | 6        |
| 3    | <b>Figure S3.</b> $^{13}\text{C}$ -NMR spectrum of compound <b>4b</b> in DMSO- <i>d</i> 6 at 100MHz.  | 6        |
| 4    | <b>Figure S4.</b> LC/MS spectrum of compound <b>4b</b>                                                | 7        |
| 5    | <b>Figure S5.</b> LC/MS spectrum of compound <b>4c</b> .                                              | 7        |
| 6    | <b>Figure S6.</b> $^1\text{H}$ -NMR spectrum of compound <b>4d</b> in DMSO- <i>d</i> 6 at 400MHz.     | 8        |
| 7    | <b>Figure S7.</b> $^{13}\text{C}$ -NMR spectrum of compound <b>4d</b> in DMSO- <i>d</i> 6 at 100MHz.  | 9        |
| 8    | <b>Figure S8.</b> LC/MS spectrum of compound <b>4d</b>                                                | 10       |
| 9    | <b>Figure S9.</b> $^1\text{H}$ -NMR spectrum of compound <b>4e</b> in DMSO- <i>d</i> 6 at 400MHz.     | 10       |
| 10   | <b>Figure S10.</b> $^{13}\text{C}$ -NMR spectrum of compound <b>4e</b> in DMSO- <i>d</i> 6 at 100MHz. | 11       |
| 11   | <b>Figure S11.</b> LC/MS spectrum of compound <b>4e</b>                                               | 12       |
| 12   | <b>Figure S12.</b> $^1\text{H}$ -NMR spectrum of compound <b>6a</b> in DMSO- <i>d</i> 6 at 400MHz.    | 12       |
| 13   | <b>Figure S13.</b> $^{13}\text{C}$ -NMR spectrum of compound <b>6a</b> in DMSO- <i>d</i> 6 at 100MHz. | 13       |
| 14   | <b>Figure S14.</b> LC/MS spectrum of compound <b>6a</b>                                               | 14       |
| 15   | <b>Figure S15.</b> LC/MS spectrum of compound <b>6b</b>                                               | 14       |
| 16   | <b>Figure S16.</b> $^1\text{H}$ -NMR spectrum of compound <b>6c</b> in DMSO- <i>d</i> 6 at 400MHz.    | 15       |
| 17   | <b>Figure S17.</b> $^{13}\text{C}$ -NMR spectrum of compound <b>6c</b> in DMSO- <i>d</i> 6 at 100MHz. | 16       |
| 18   | <b>Figure S18.</b> LC/MS spectrum of compound <b>6c</b>                                               | 17       |
| 19   | <b>Figure S19.</b> $^1\text{H}$ -NMR spectrum of compound <b>6d</b> in DMSO- <i>d</i> 6 at 400MHz.    | 18       |
| 20   | <b>Figure S20.</b> $^{13}\text{C}$ -NMR spectrum of compound <b>6d</b> in DMSO- <i>d</i> 6 at 100MHz. | 19       |

|    |                                                                                                       |    |
|----|-------------------------------------------------------------------------------------------------------|----|
| 21 | <b>Figure S21.</b> LC/MS spectrum of compound <b>6d</b> .                                             | 19 |
| 22 | <b>Figure S22.</b> $^1\text{H}$ -NMR spectrum of compound <b>6e</b> in DMSO- <i>d</i> 6 at 400MHz.    | 20 |
| 23 | <b>Figure S23.</b> $^{13}\text{C}$ -NMR spectrum of compound <b>6e</b> in DMSO- <i>d</i> 6 at 100MHz. | 20 |
| 24 | <b>Figure S24.</b> LC/MS spectrum of compound <b>6e</b> .                                             | 21 |
| 25 | <b>Figure S25.</b> $^1\text{H}$ -NMR spectrum of compound <b>6f</b> in DMSO- <i>d</i> 6 at 400MHz.    | 22 |
| 26 | <b>Figure S26.</b> $^{13}\text{C}$ -NMR spectrum of compound <b>6f</b> in DMSO- <i>d</i> 6 at 100MHz. | 23 |
| 27 | <b>Figure S27.</b> LC/MS spectrum of compound <b>6f</b> .                                             | 23 |
| 28 | <b>Figure S28.</b> $^1\text{H}$ -NMR spectrum of compound <b>7a</b> in DMSO- <i>d</i> 6 at 400MHz.    | 24 |
| 29 | <b>Figure S29.</b> $^{13}\text{C}$ -NMR spectrum of compound <b>7a</b> in DMSO- <i>d</i> 6 at 100MHz. | 24 |
| 30 | <b>Figure S30.</b> LC/MS spectrum of compound <b>7a</b> .                                             | 25 |
| 31 | <b>Figure S31.</b> $^1\text{H}$ -NMR spectrum of compound <b>7b</b> in DMSO- <i>d</i> 6 at 400MHz.    | 25 |
| 32 | <b>Figure S32.</b> $^{13}\text{C}$ -NMR spectrum of compound <b>7b</b> in DMSO- <i>d</i> 6 at 100MHz. | 26 |
| 33 | <b>Figure S33.</b> LC/MS spectrum of compound <b>7b</b> .                                             | 27 |
| 34 | <b>Figure S34.</b> $^1\text{H}$ -NMR spectrum of compound <b>7c</b> in DMSO- <i>d</i> 6 at 400MHz.    | 28 |
| 35 | <b>Figure S35.</b> $^{13}\text{C}$ -NMR spectrum of compound <b>7c</b> in DMSO- <i>d</i> 6 at 100MHz. | 28 |
| 36 | <b>Figure S36.</b> LC/MS spectrum of compound <b>7c</b> .                                             | 29 |
| 37 | <b>Figure S37.</b> $^1\text{H}$ -NMR spectrum of compound <b>7d</b> in DMSO- <i>d</i> 6 at 400MHz.    | 29 |
| 38 | <b>Figure S38.</b> $^{13}\text{C}$ -NMR spectrum of compound <b>7d</b> in DMSO- <i>d</i> 6 at 100MHz. | 30 |
| 39 | <b>Figure S39.</b> LC/MS spectrum of compound <b>7d</b> .                                             | 30 |

|    |                                                                                                                                                                                |    |
|----|--------------------------------------------------------------------------------------------------------------------------------------------------------------------------------|----|
| 40 | <b>Figure S40.</b> $^1\text{H}$ -NMR spectrum of compound <b>7e</b> in DMSO- <i>d</i> <sub>6</sub> at 400MHz.                                                                  | 31 |
| 41 | <b>Figure S41.</b> $^{13}\text{C}$ -NMR spectrum of compound <b>7e</b> in DMSO- <i>d</i> <sub>6</sub> at 100MHz.                                                               | 31 |
| 42 | <b>Figure S42.</b> LC/MS spectrum of compound <b>7e</b> .                                                                                                                      | 32 |
| 43 | <b>Figure S43.</b> $^1\text{H}$ -NMR spectrum of compound <b>7f</b> in DMSO- <i>d</i> <sub>6</sub> at 400MHz.                                                                  | 32 |
| 44 | <b>Figure S44.</b> $^{13}\text{C}$ -NMR spectrum of compound <b>7f</b> in DMSO- <i>d</i> <sub>6</sub> at 100MHz.                                                               | 33 |
| 45 | <b>Figure S45.</b> LC/MS spectrum of compound <b>7f</b> .                                                                                                                      | 34 |
| 46 | <b>Figure S46.</b> $^1\text{H}$ -NMR spectrum of compound <b>9a</b> in DMSO- <i>d</i> <sub>6</sub> at 400MHz.                                                                  | 34 |
| 47 | <b>Figure S47.</b> $^{13}\text{C}$ -NMR spectrum of compound <b>9a</b> in DMSO- <i>d</i> <sub>6</sub> at 100MHz.                                                               | 35 |
| 48 | <b>Figure S48.</b> LC/MS spectrum of compound <b>9a</b> .                                                                                                                      | 35 |
| 49 | <b>Figure S49.</b> $^1\text{H}$ -NMR spectrum of compound <b>9b</b> in DMSO- <i>d</i> <sub>6</sub> at 400MHz.                                                                  | 36 |
| 50 | <b>Figure S50.</b> $^{13}\text{C}$ -NMR spectrum of compound <b>9b</b> in DMSO- <i>d</i> <sub>6</sub> at 100MHz.                                                               | 36 |
| 51 | <b>Figure S51.</b> LC/MS spectrum of compound <b>9b</b> .                                                                                                                      | 37 |
| 52 | <b>Figure S52.</b> Tubulin polymerization assay for compound <b>4b</b>                                                                                                         | 37 |
| 53 | <b>Figure S53.</b> Tubulin polymerization assay for compound <b>4a</b>                                                                                                         | 38 |
| 54 | <b>Figure S54.</b> Epidermal growth factor receptor (EGFR) inhibition assay for compound <b>4b</b>                                                                             | 38 |
| 55 | <b>Figure S55.</b> Epidermal growth factor receptor (EGFR) inhibition assay for compound <b>4a</b>                                                                             | 39 |
| 56 | <b>Figure S56.</b> Casein kinase I (CK1) inhibition assay                                                                                                                      | 40 |
| 57 | <b>Figure S57.</b> P-gp substrate assay.                                                                                                                                       | 41 |
| 58 | <b>Figure S58.</b> IC <sub>50</sub> of compounds <b>4a</b> (IC <sub>261</sub> ), <b>4b</b> , <b>4d</b> , <b>4e</b> , <b>6e</b> and <b>6f</b> against COLO-205 using SRB assay. | 42 |
| 59 | <b>Figure S59.</b> Cytotoxicity assay and IC <sub>50</sub> of compounds <b>4a</b> , <b>4b</b> and <b>5-FU</b> against <b>A549</b> cell line                                    | 43 |
| 60 | <b>Cell culture protocol</b>                                                                                                                                                   | 44 |
| 61 | <b>Figure S60.</b> Raw data of cytotoxicity assay and IC <sub>50</sub> of compounds <b>4a</b> , <b>4b</b> and <b>5-FU</b> against <b>A549</b> cell line.                       | 46 |
| 62 | <b>Figure S61.</b> Elemental analysis data.                                                                                                                                    | 47 |





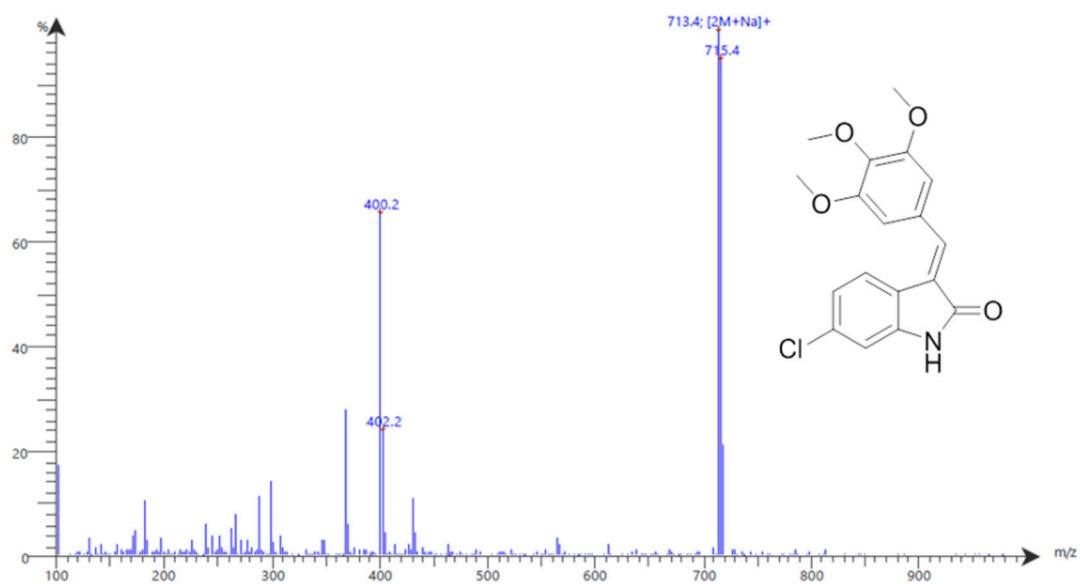

**Figure S1.** LC/MS spectrum of compound **3b**.

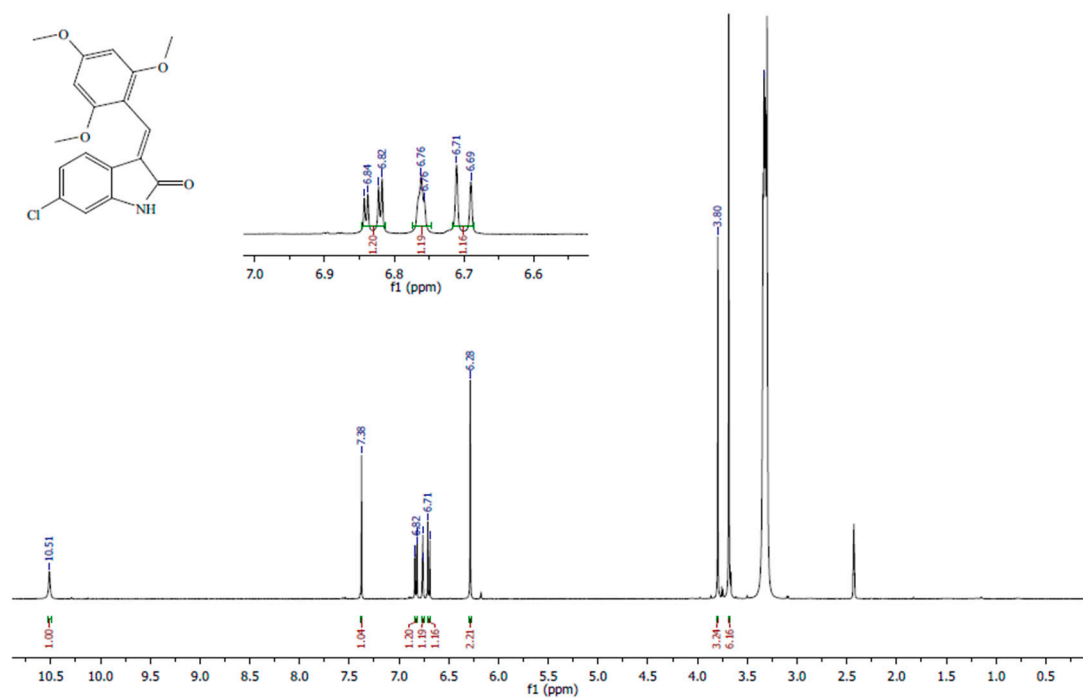

**Figure S2.** <sup>1</sup>H-NMR spectrum of compound **4b** in DMSO-*d*<sub>6</sub> at 400MHz.

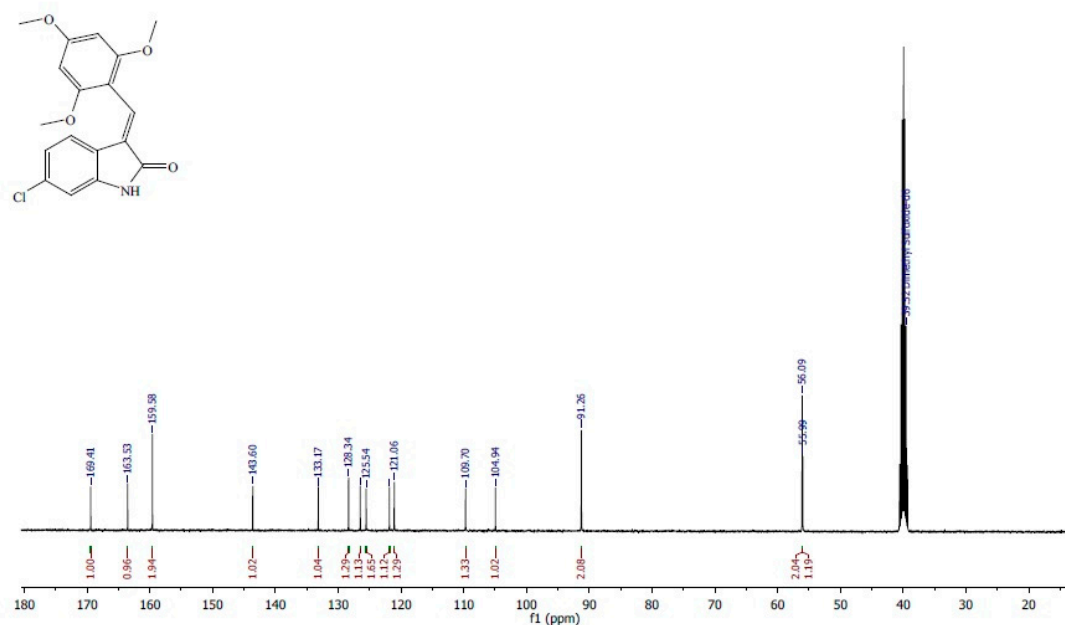

**Figure S3.** <sup>13</sup>C-NMR spectrum of compound **4b** in DMSO-*d*<sub>6</sub> at 100MHz.

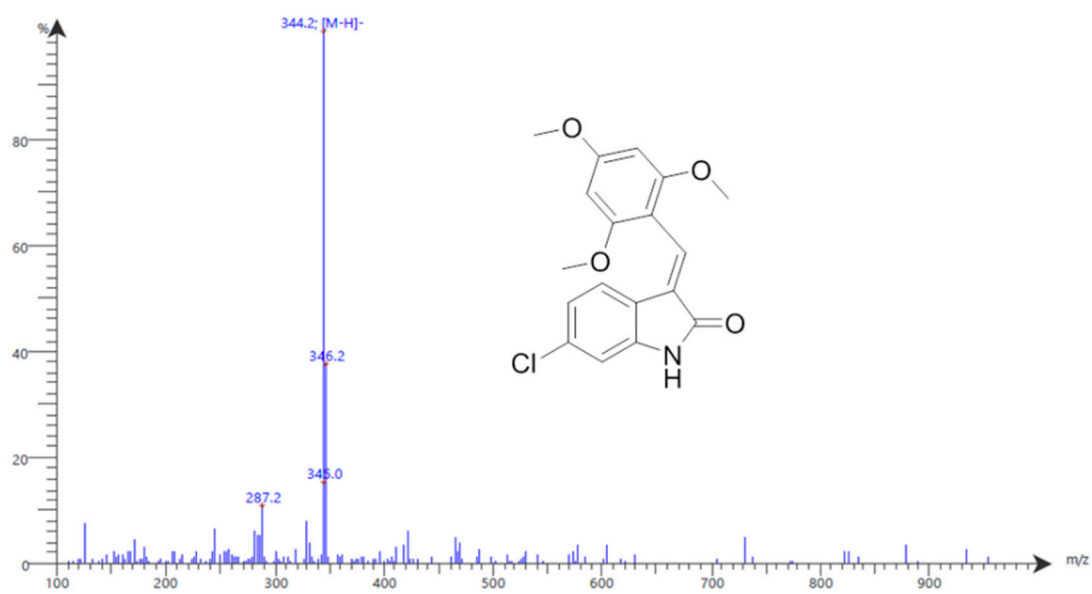

**Figure S4.** LC/MS spectrum of compound **4b**.

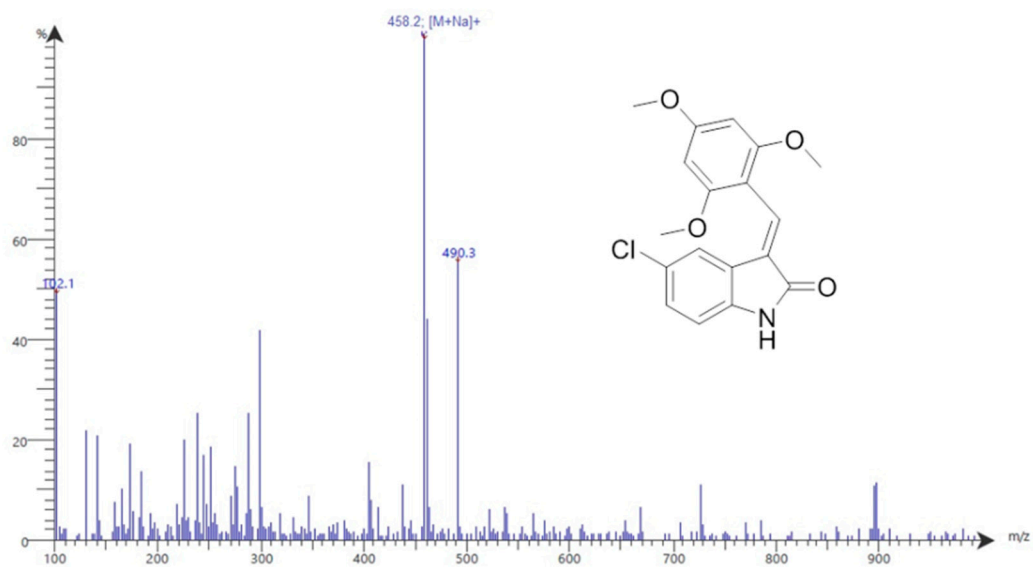

**Figure S5.** LC/MS spectrum of compound **4c**.

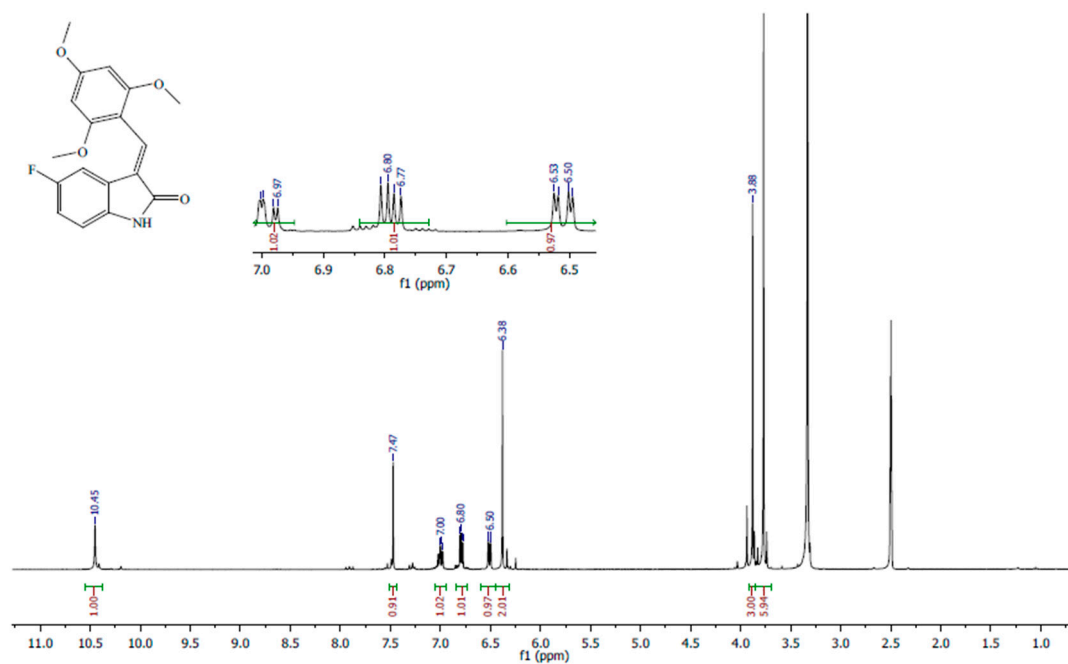

**Figure S6.**  $^1\text{H}$ -NMR spectrum of compound **4d** in  $\text{DMSO}-d_6$  at 500MHz.

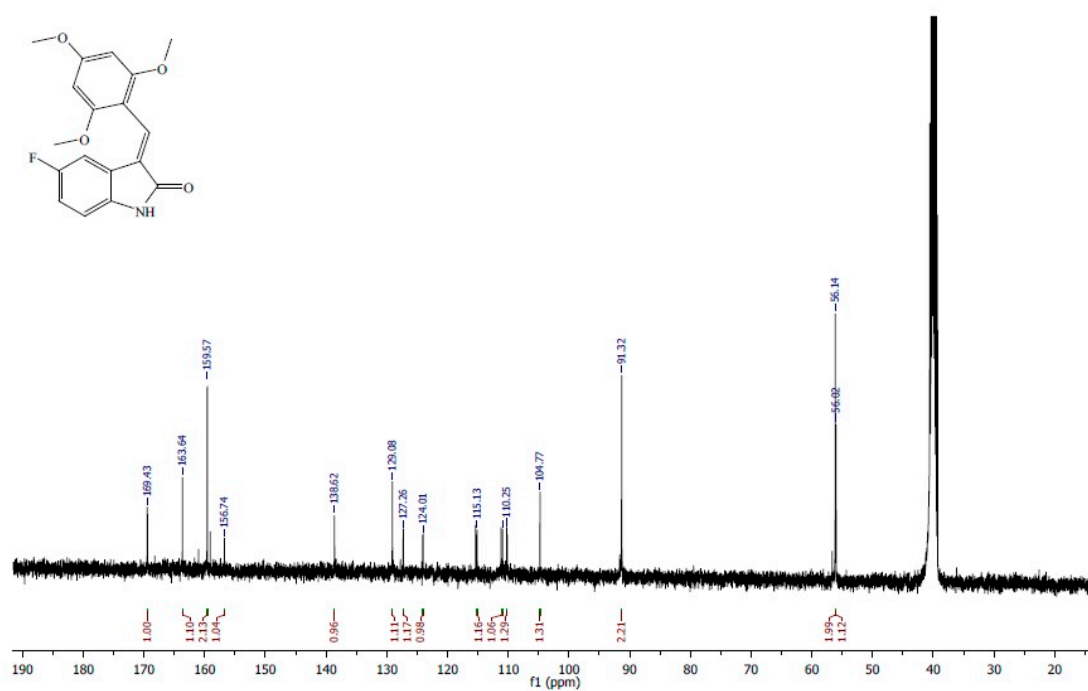

**Figure S7.**  $^{13}\text{C}$ -NMR spectrum of compound **4d** in  $\text{DMSO}-d_6$  at 100MHz.

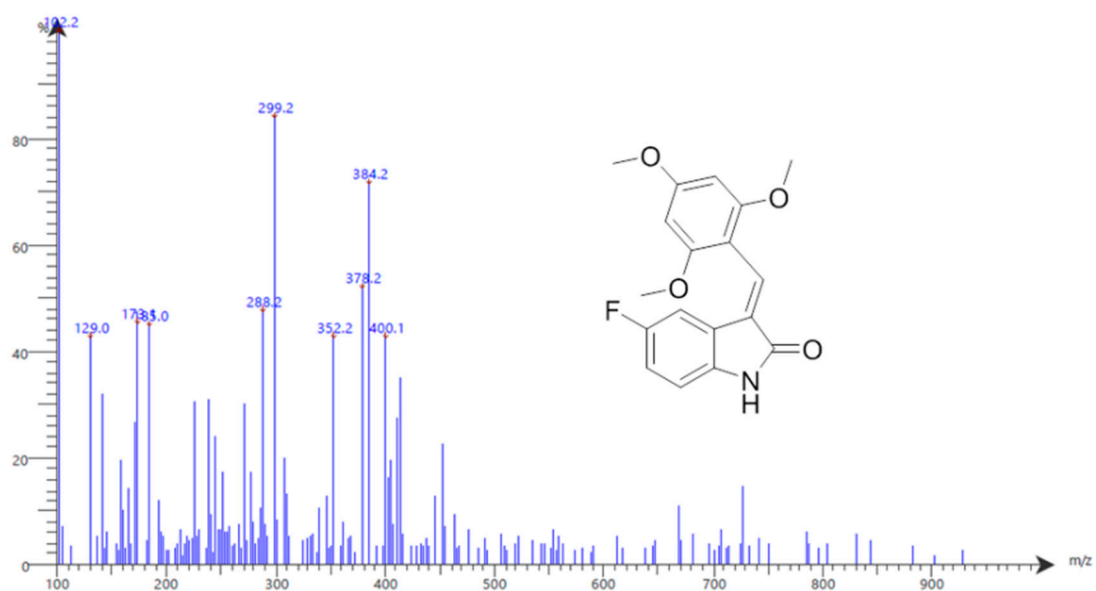

**Figure S8.** LC/MS spectrum of compound **4d**.

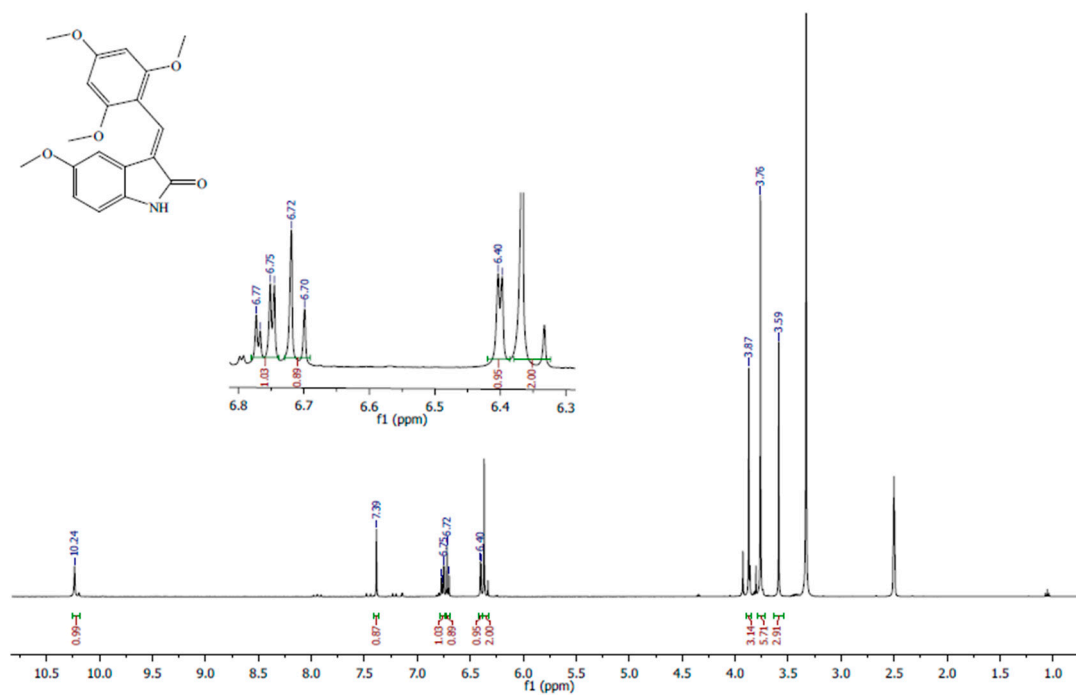

**Figure S9.** <sup>1</sup>H-NMR spectrum of compound **4e** in DMSO-*d*<sub>6</sub> at 400MHz.

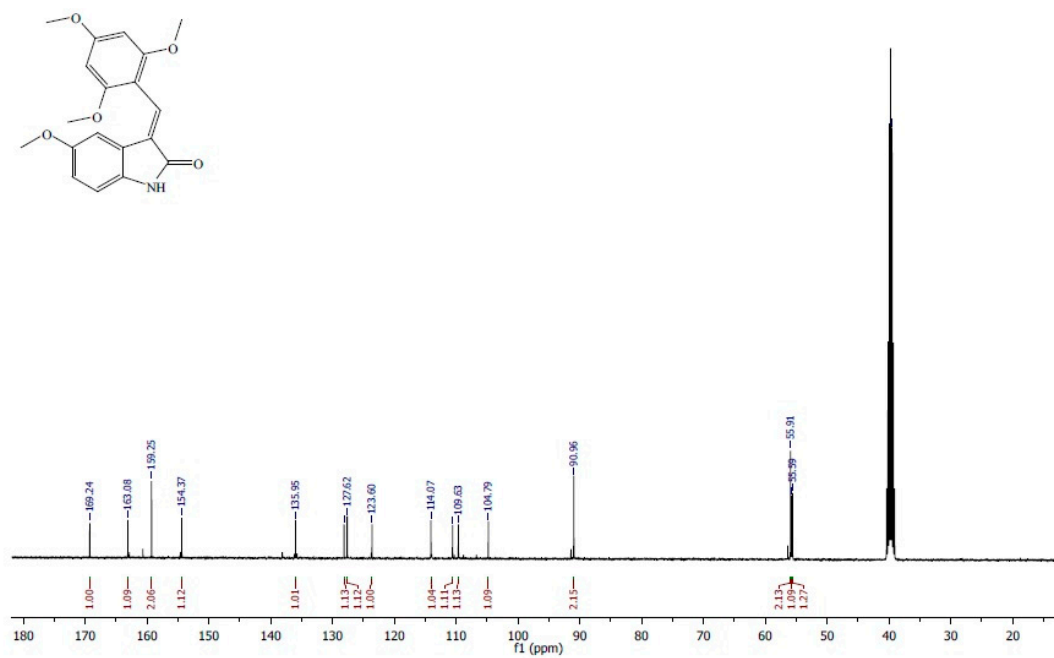

**Figure S10.** <sup>13</sup>C-NMR spectrum of compound **4e** in DMSO-*d*<sub>6</sub> at 100MHz.

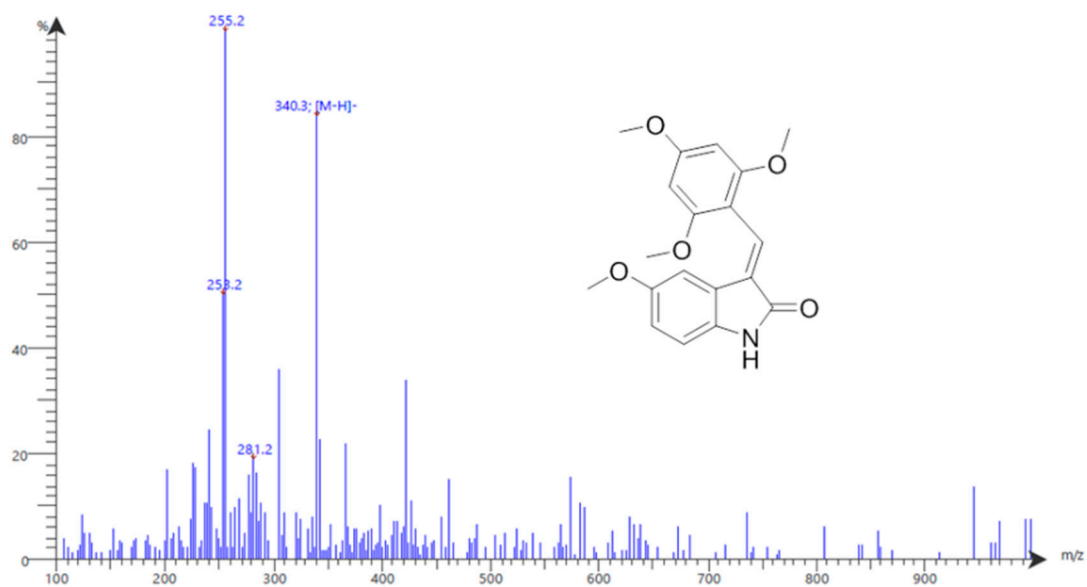

**Figure S11.** LC/MS spectrum of compound **4e**.



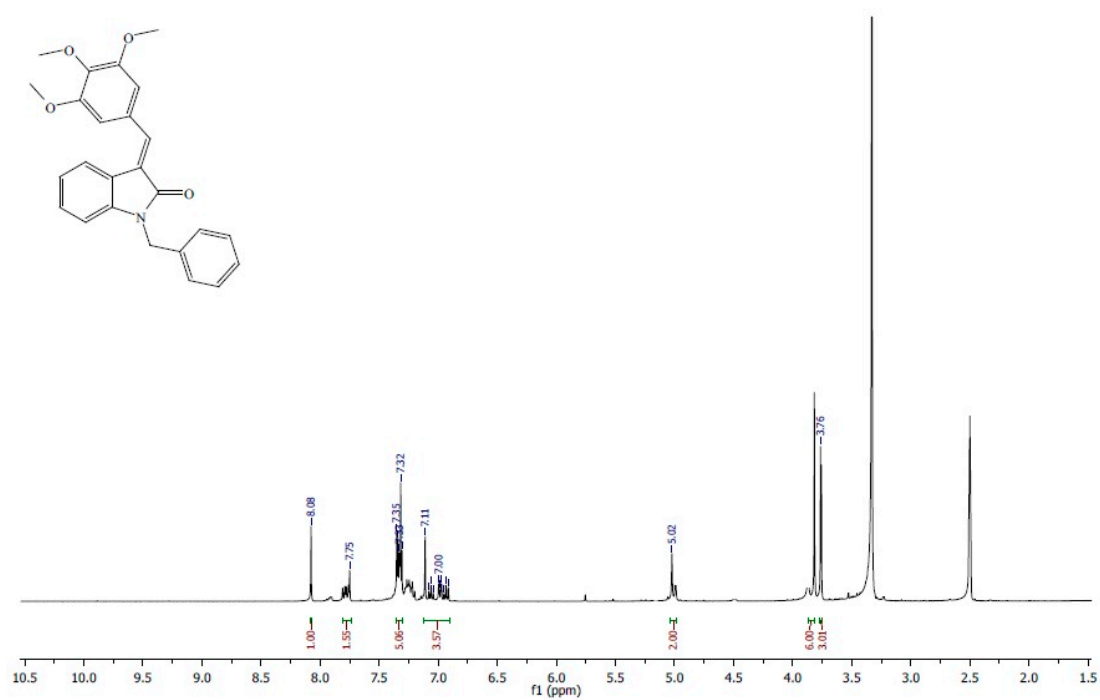

**Figure S12.** <sup>1</sup>H-NMR spectrum of compound **6a** in DMSO-*d*<sub>6</sub> at 400MHz.

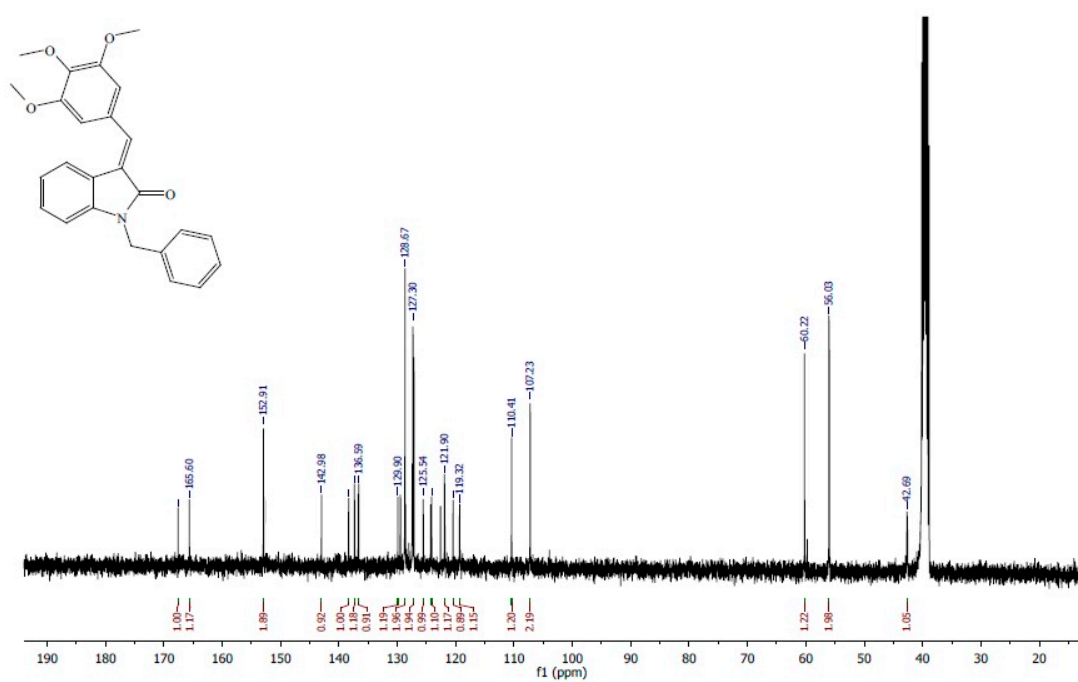

**Figure S13.** <sup>13</sup>C-NMR spectrum of compound **6a** in DMSO-*d*<sub>6</sub> at 100MHz.

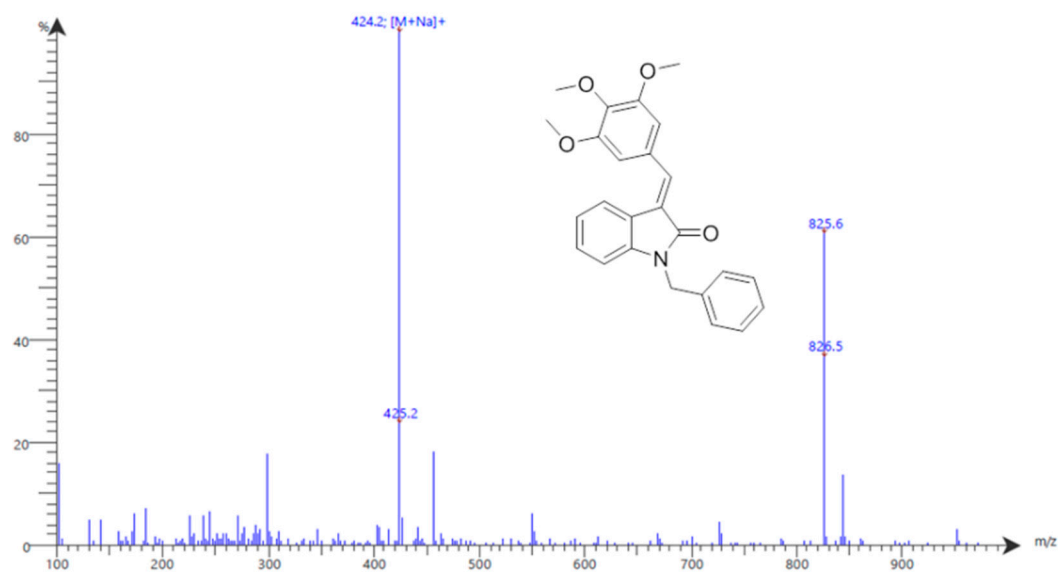

**Figure S14.** LC/MS spectrum of compound **6a**.

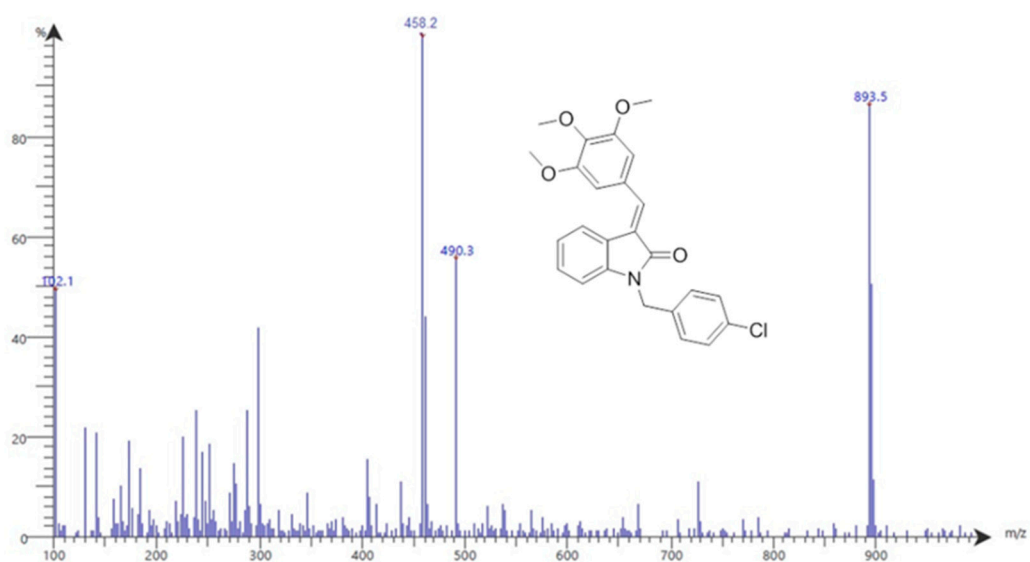

**Figure S15.** LC/MS spectrum of compound **6b**.

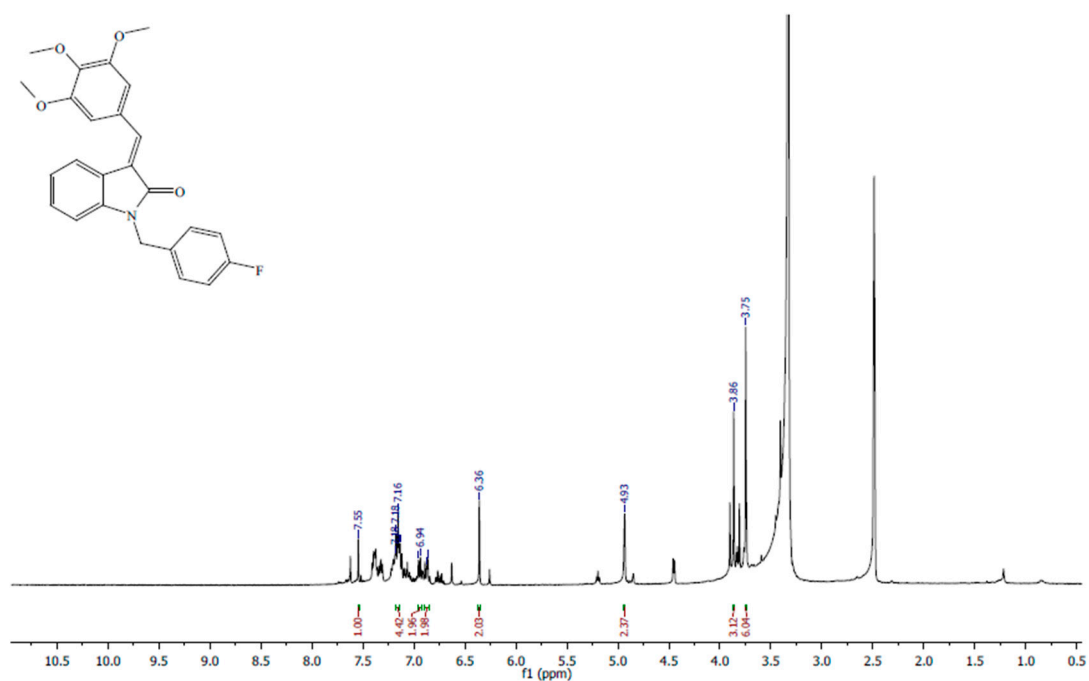

**Figure S16.** <sup>1</sup>H-NMR spectrum of compound **6c** in DMSO-*d*<sub>6</sub> at 400MHz.

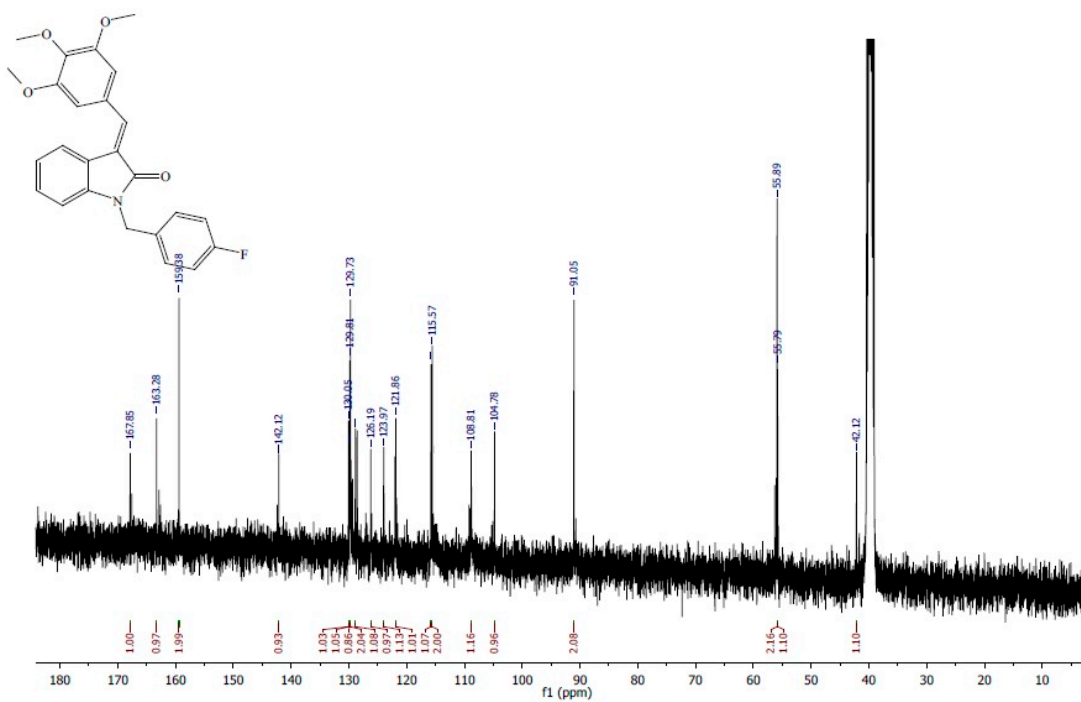

**Figure S17.** <sup>13</sup>C-NMR spectrum of compound **6c** in DMSO-*d*<sub>6</sub> at 100MHz.

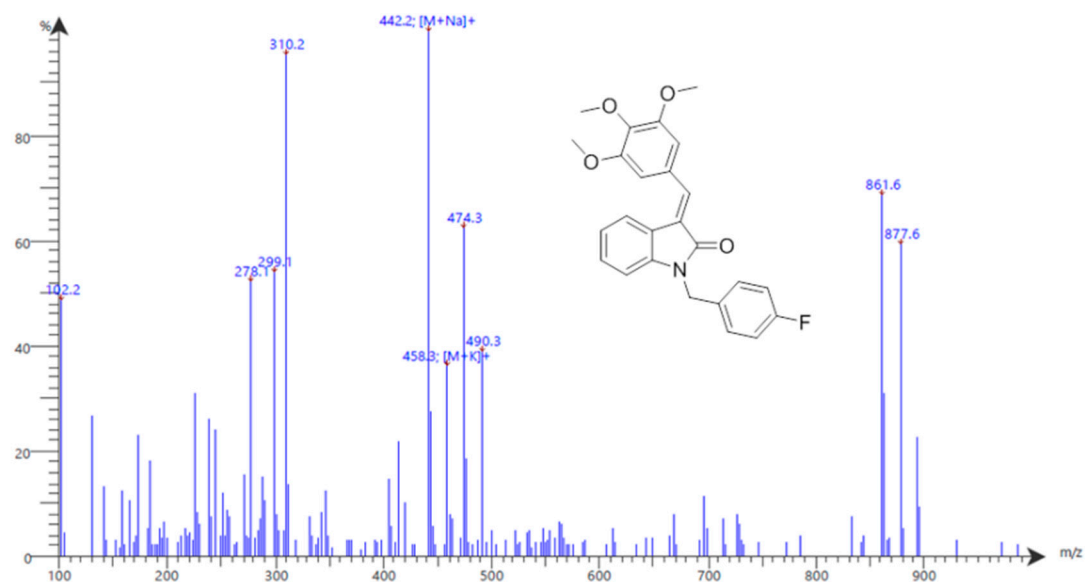

**Figure S18.** LC/MS spectrum of compound **6c**.

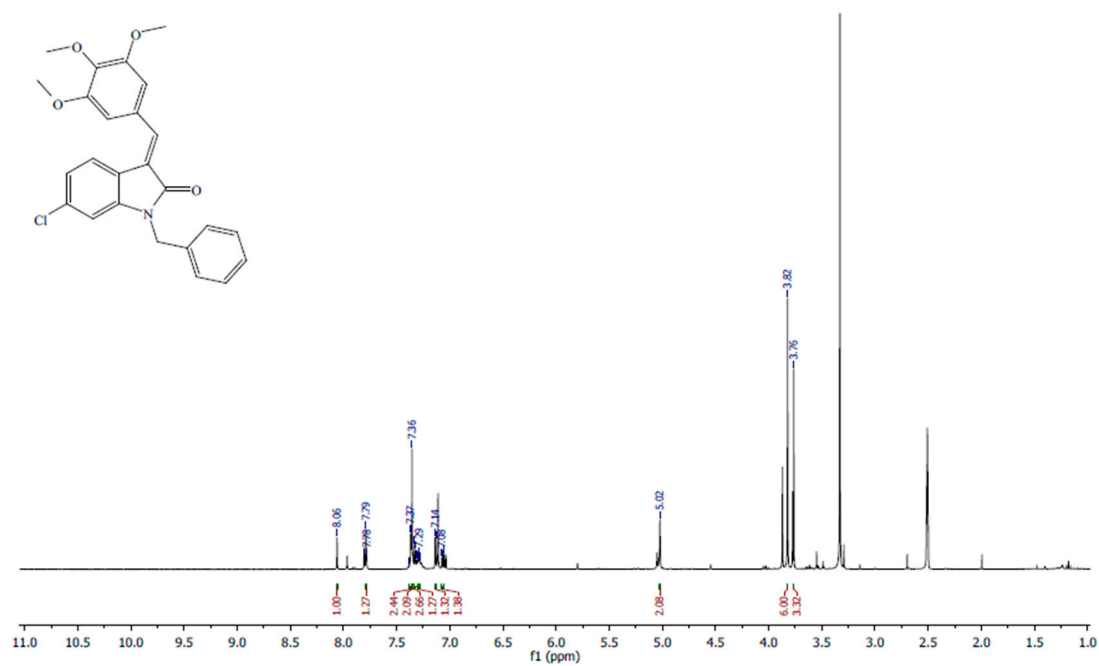

**Figure S19.** <sup>1</sup>H-NMR spectrum of compound **6d** in DMSO-*d*<sub>6</sub> at 400MHz.

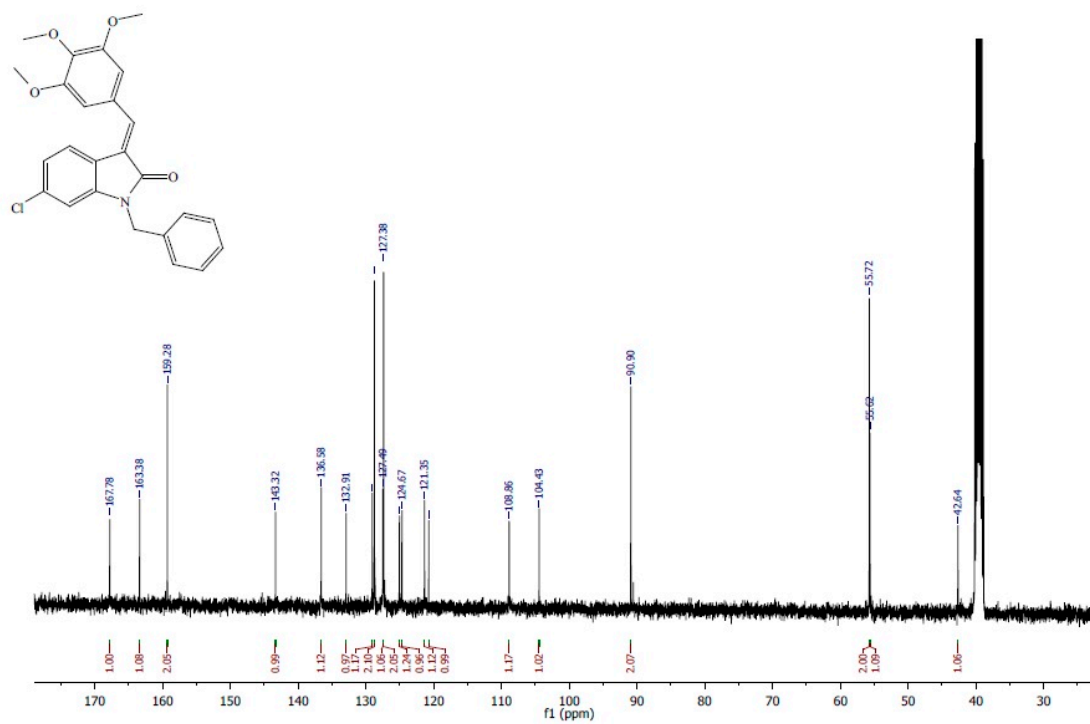

**Figure S20.** <sup>13</sup>C-NMR spectrum of compound **6d** in DMSO-*d*<sub>6</sub> at 100MHz.

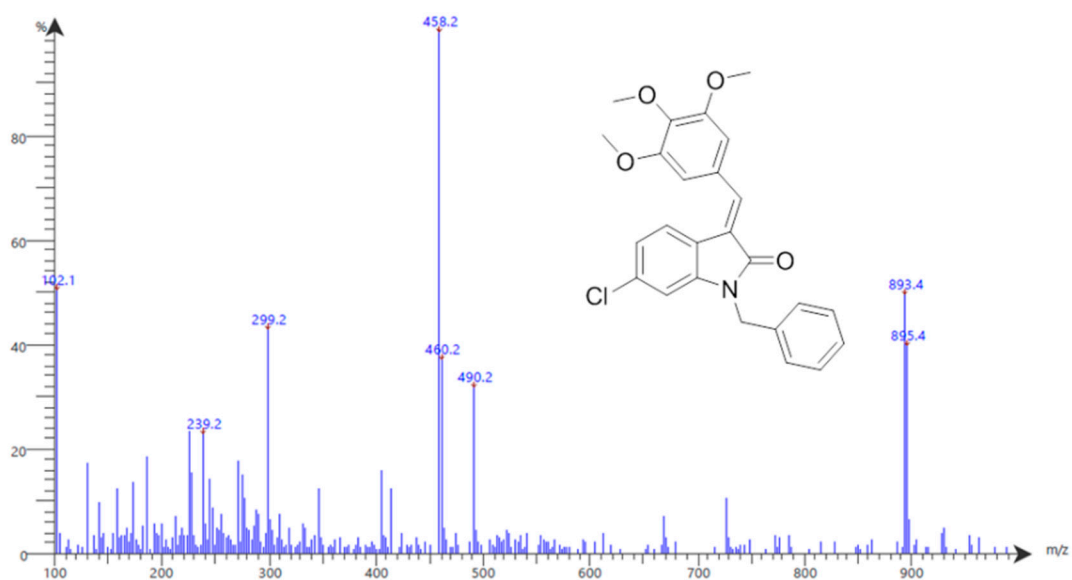

**Figure S21.** LC/MS spectrum of compound **6d**.

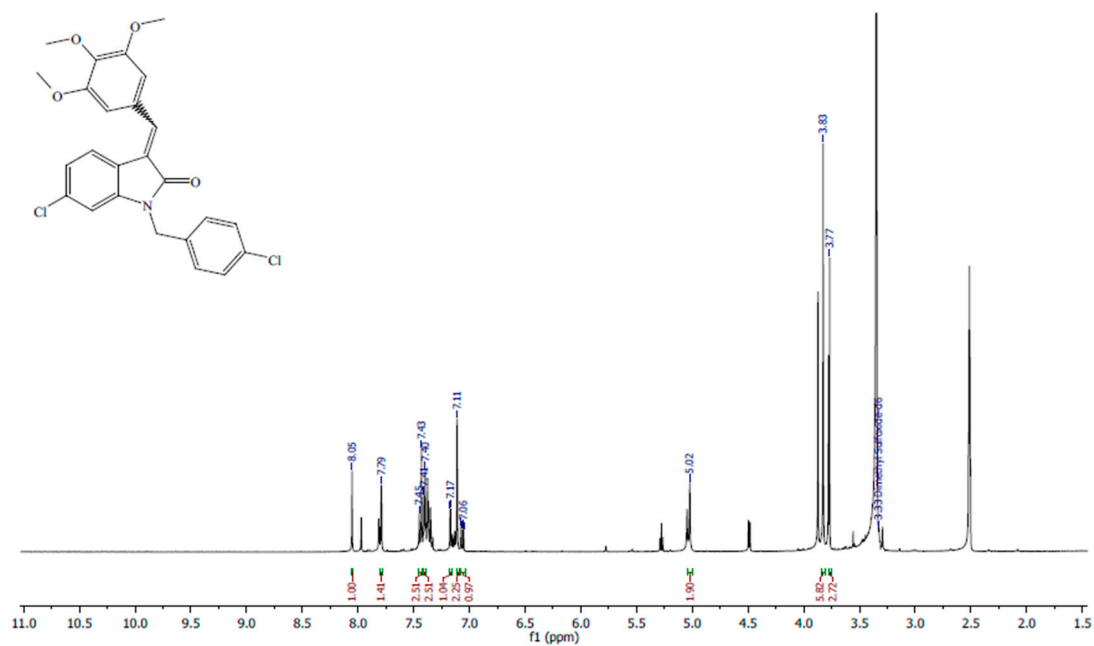

**Figure S22.** <sup>1</sup>H-NMR spectrum of compound **6e** in DMSO-*d*<sub>6</sub> at 400MHz.

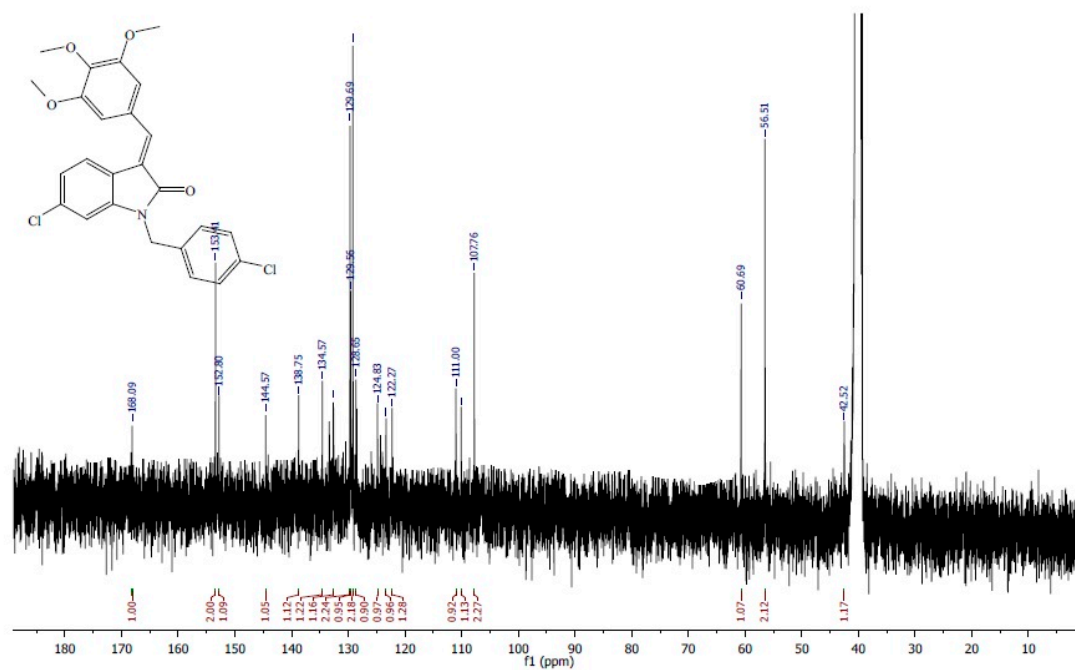

**Figure S23.** <sup>13</sup>C-NMR spectrum of compound **6e** in DMSO-*d*<sub>6</sub> at 100MHz.

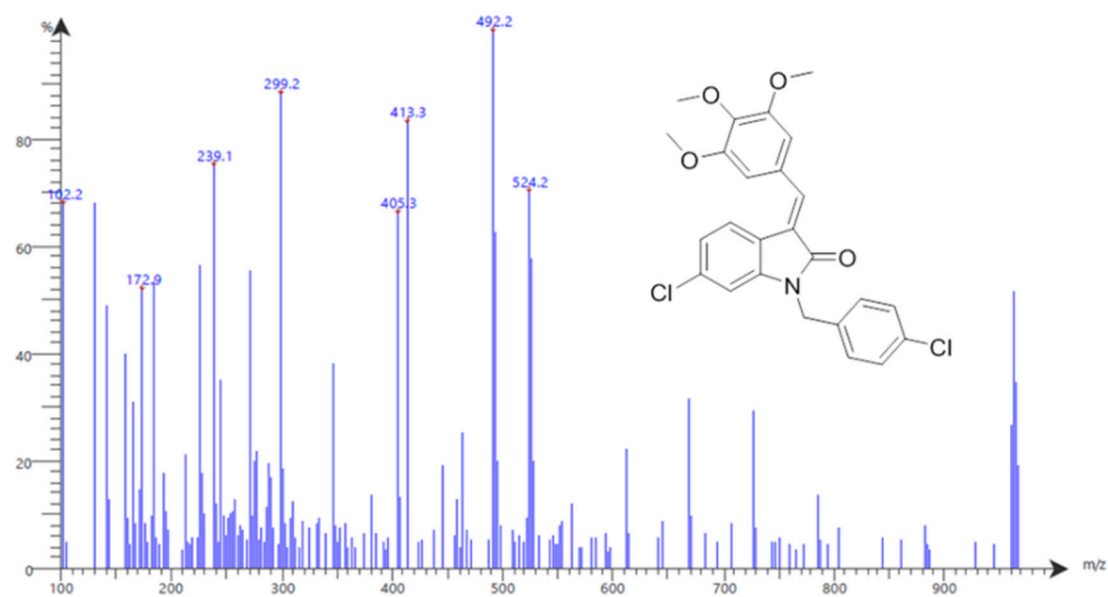

**Figure S24.** LC/MS spectrum of compound **6e**.

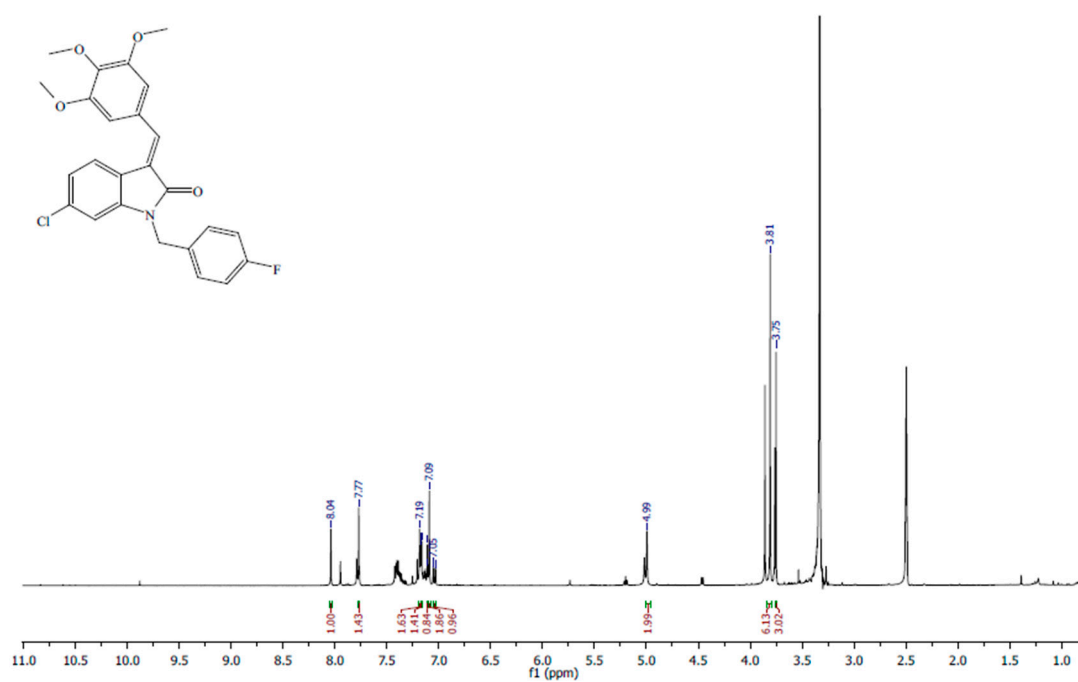

**Figure S25.**  $^1\text{H}$ -NMR spectrum of compound **6f** in  $\text{DMSO-}d_6$  at 400MHz.

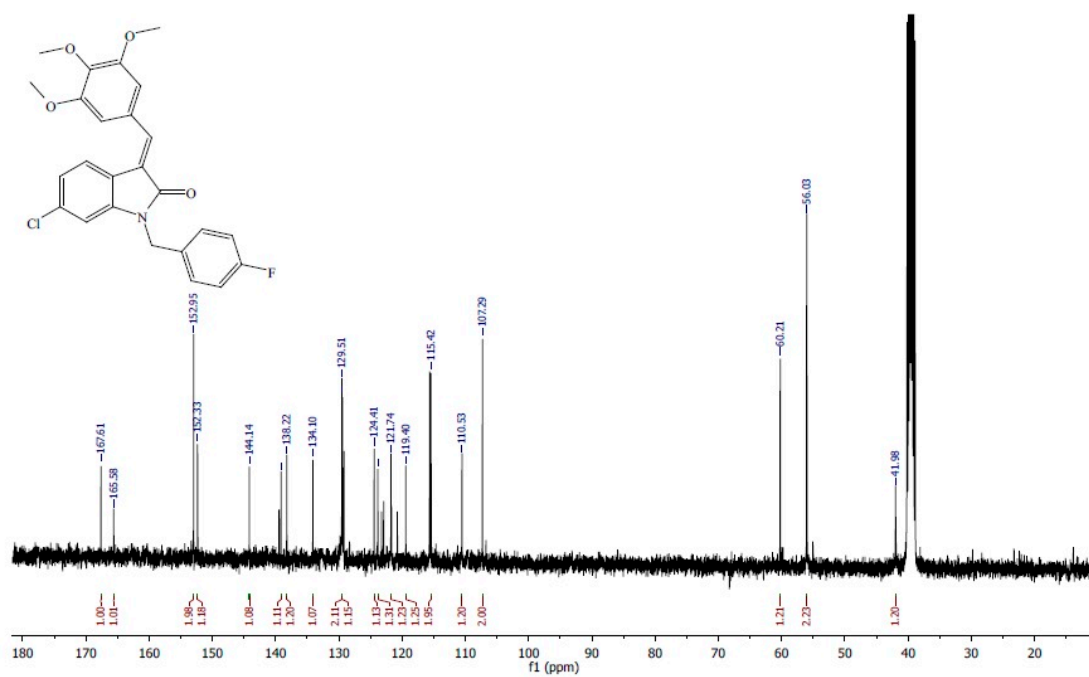

**Figure S26.**  $^{13}\text{C}$ -NMR spectrum of compound **6f** in  $\text{DMSO-}d_6$  at 100MHz.



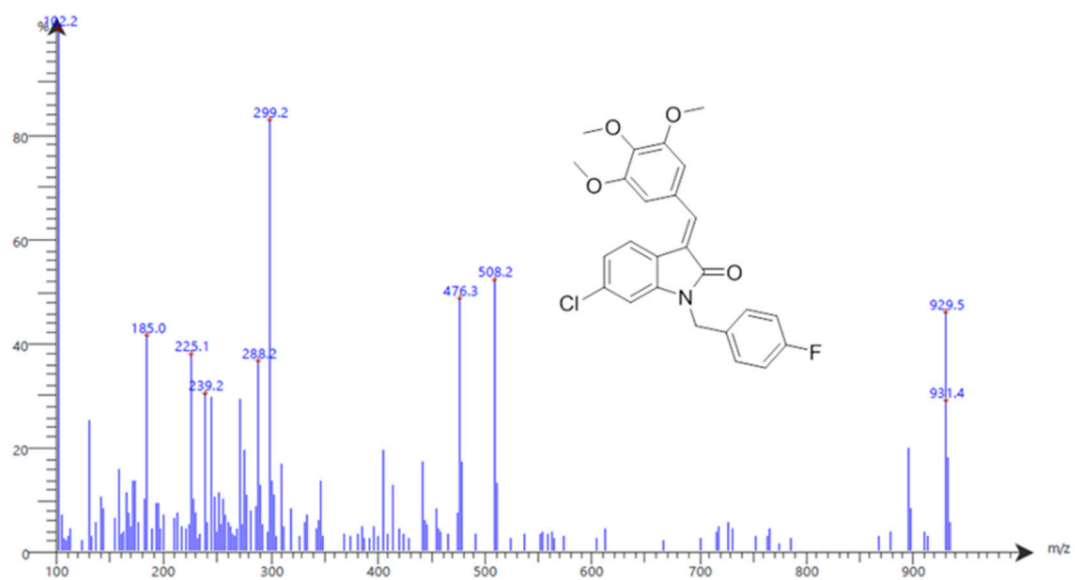

**Figure S27.** LC/MS spectrum of compound **6f**.

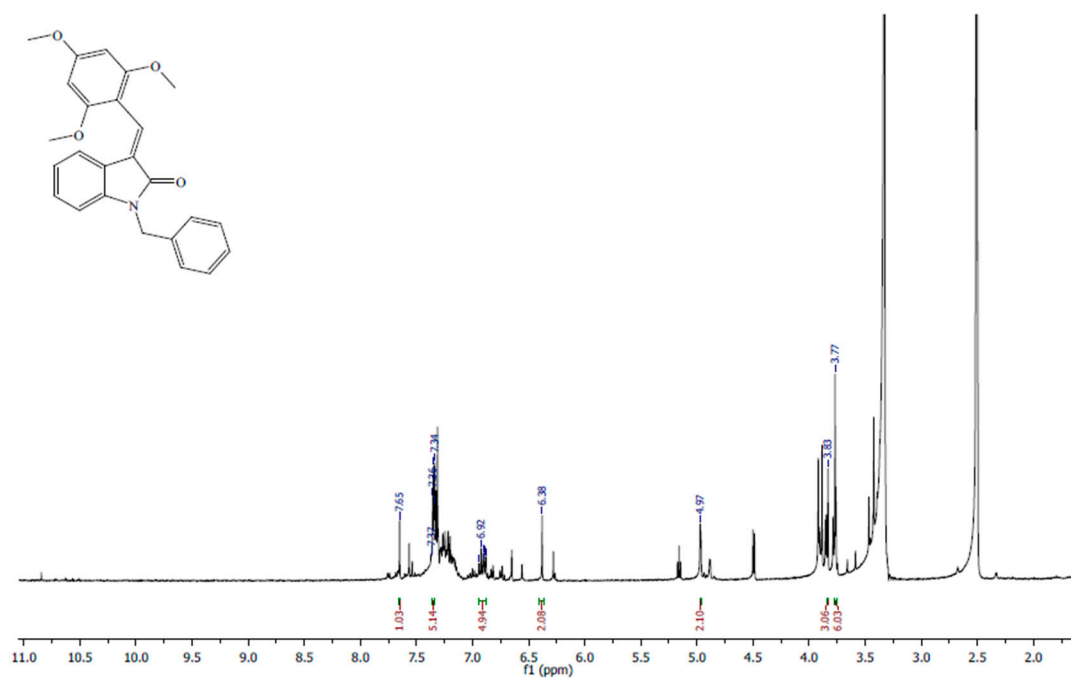

**Figure S28.** <sup>1</sup>H-NMR spectrum of compound **7a** in DMSO-*d*<sub>6</sub> at 400MHz.

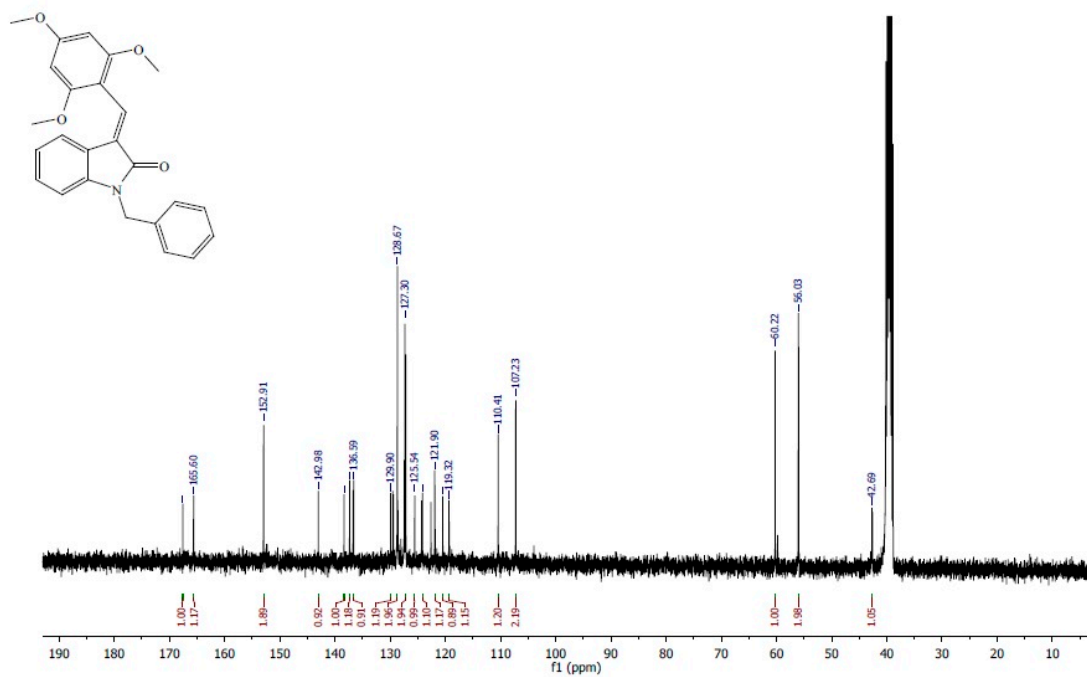

**Figure S29.** <sup>13</sup>C-NMR spectrum of compound **7a** in DMSO-*d*<sub>6</sub> at 100MHz.

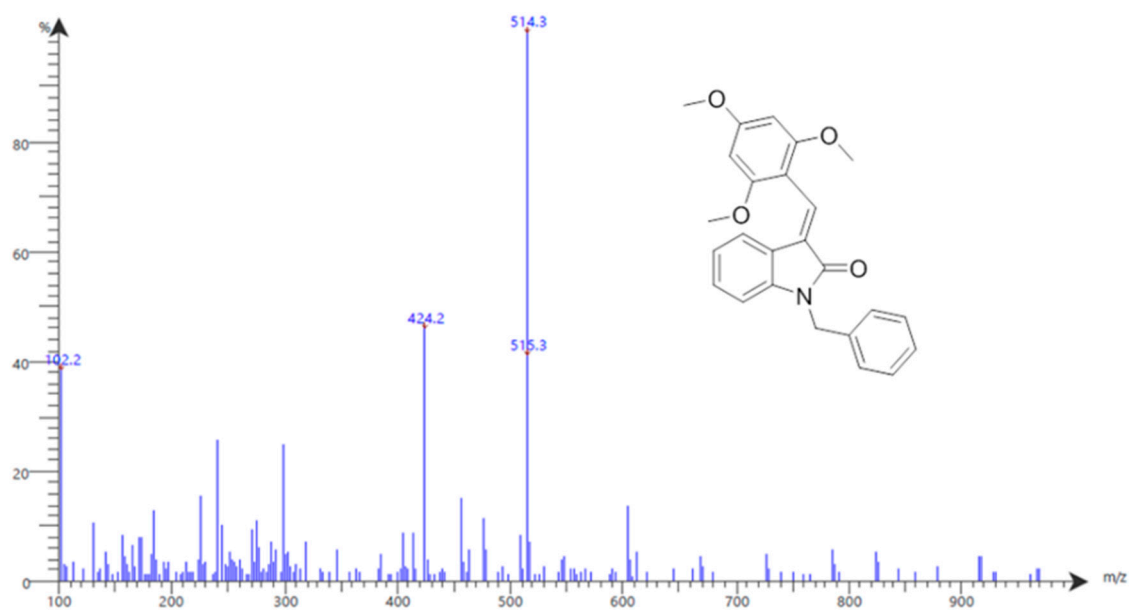

**Figure S30.** LC/MS spectrum of compound **7a**.

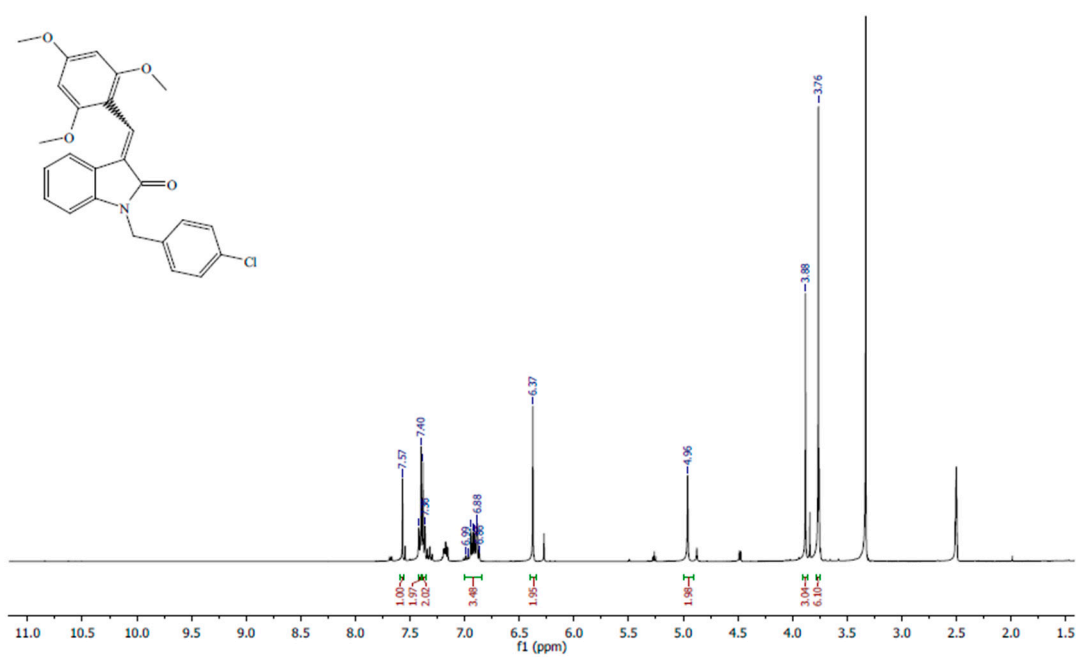

**Figure S31.**  $^1\text{H}$ -NMR spectrum of compound **7b** in  $\text{DMSO-}d_6$  at 400MHz.

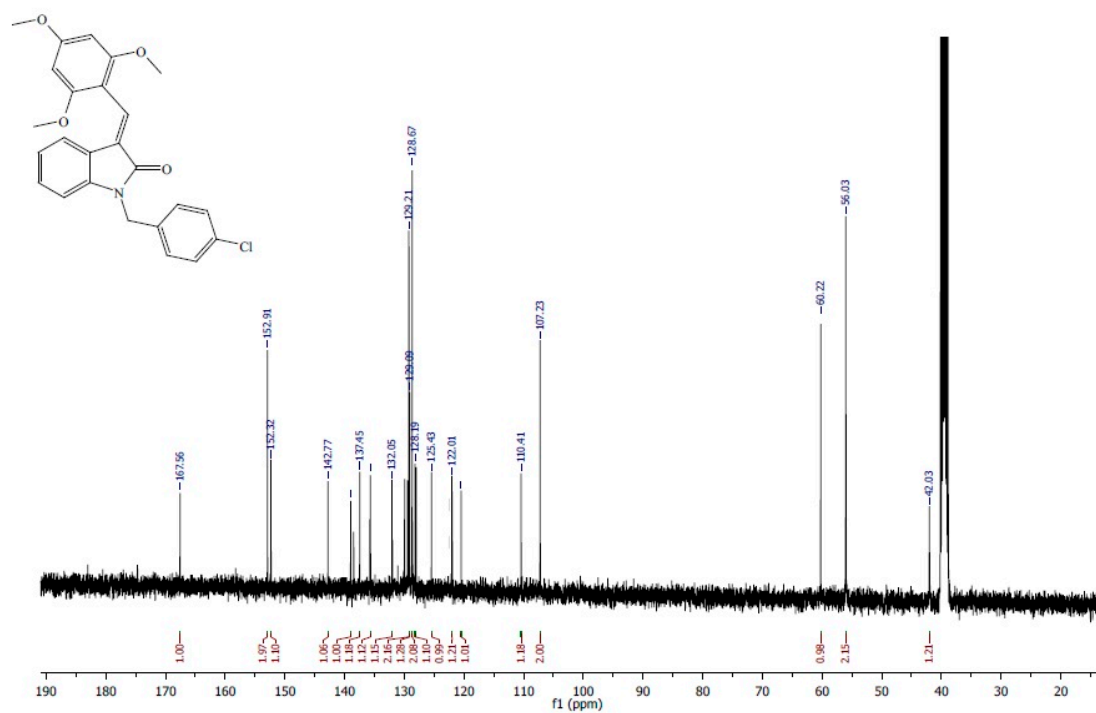

**Figure S32.** <sup>13</sup>C-NMR spectrum of compound **7b** in DMSO-*d*<sub>6</sub> at 100MHz.

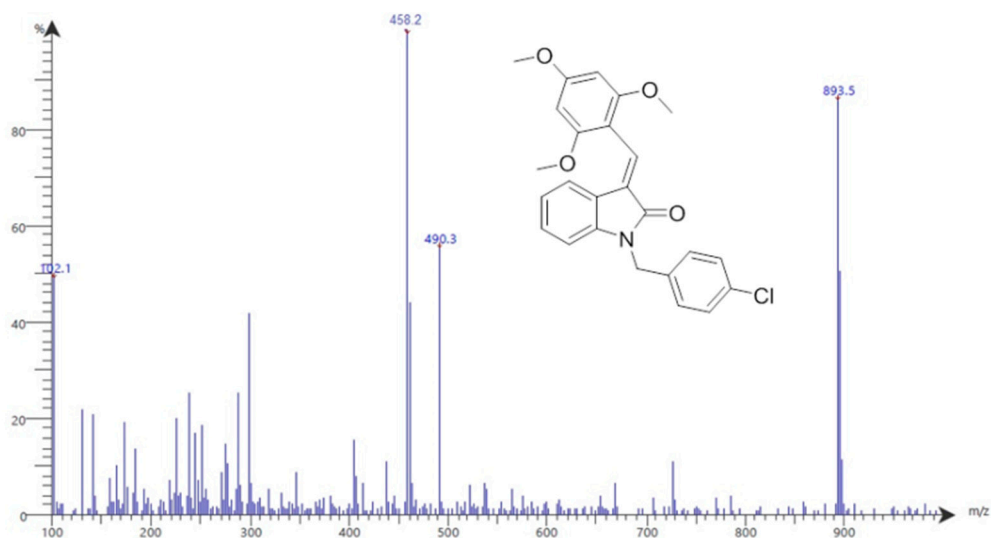

**Figure S33.** LC/MS spectrum of compound **7b**.

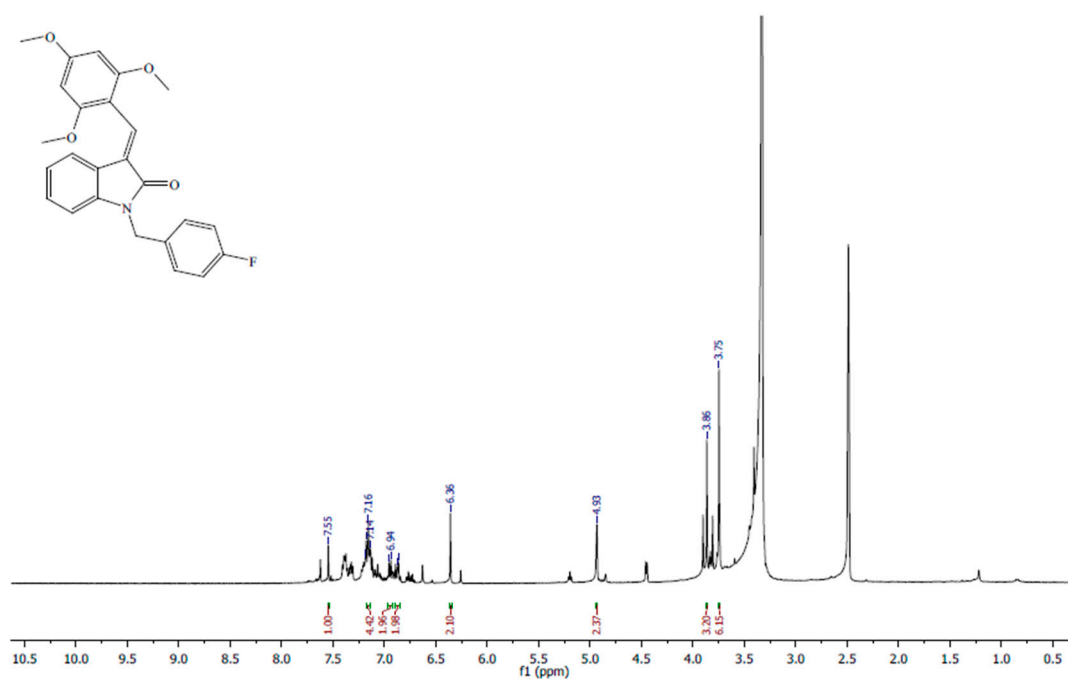

**Figure S34.** <sup>1</sup>H-NMR spectrum of compound 7c in DMSO-*d*<sub>6</sub> at 400MHz.

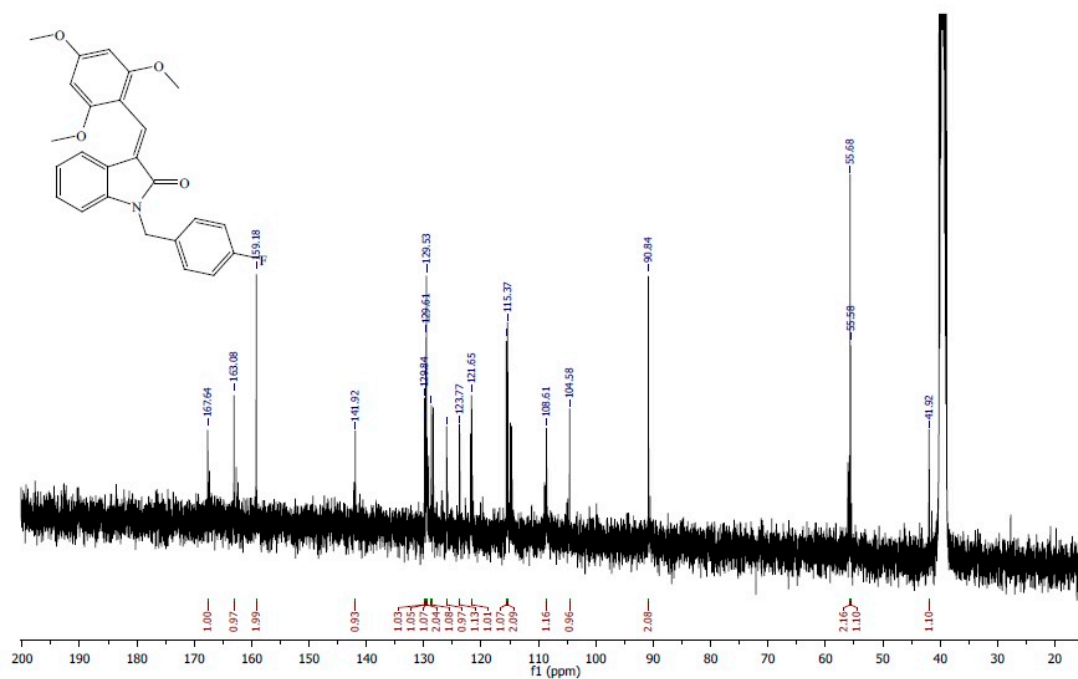

**Figure S35.** <sup>13</sup>C-NMR spectrum of compound 7c in DMSO-*d*<sub>6</sub> at 100MHz.

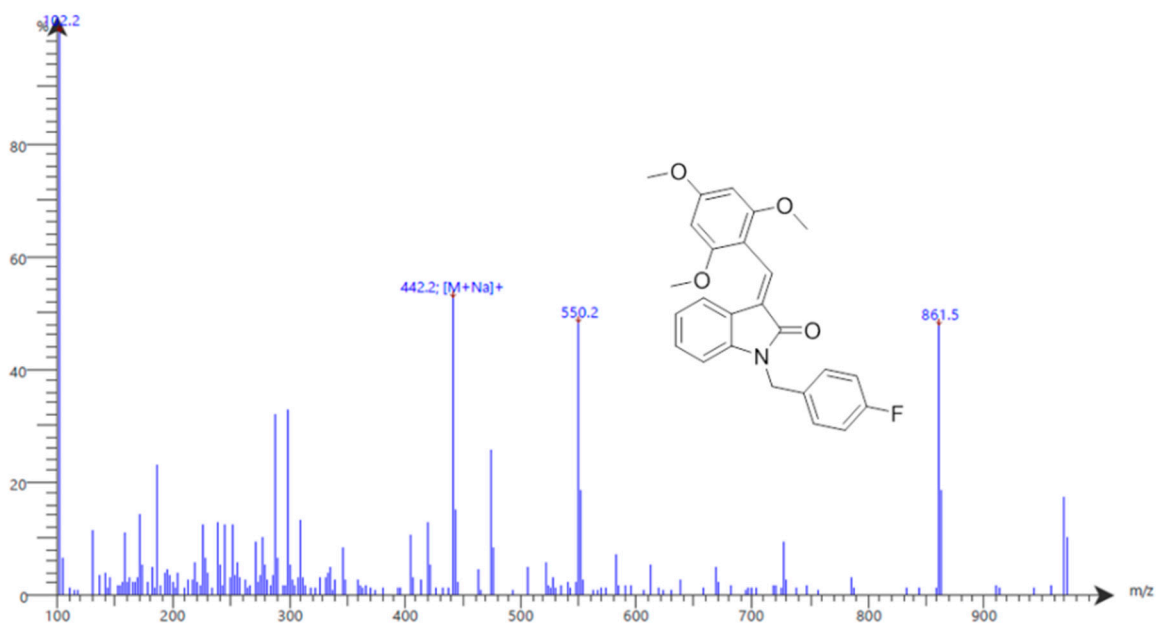

**Figure S36.** LC/MS spectrum of compound **7c**.

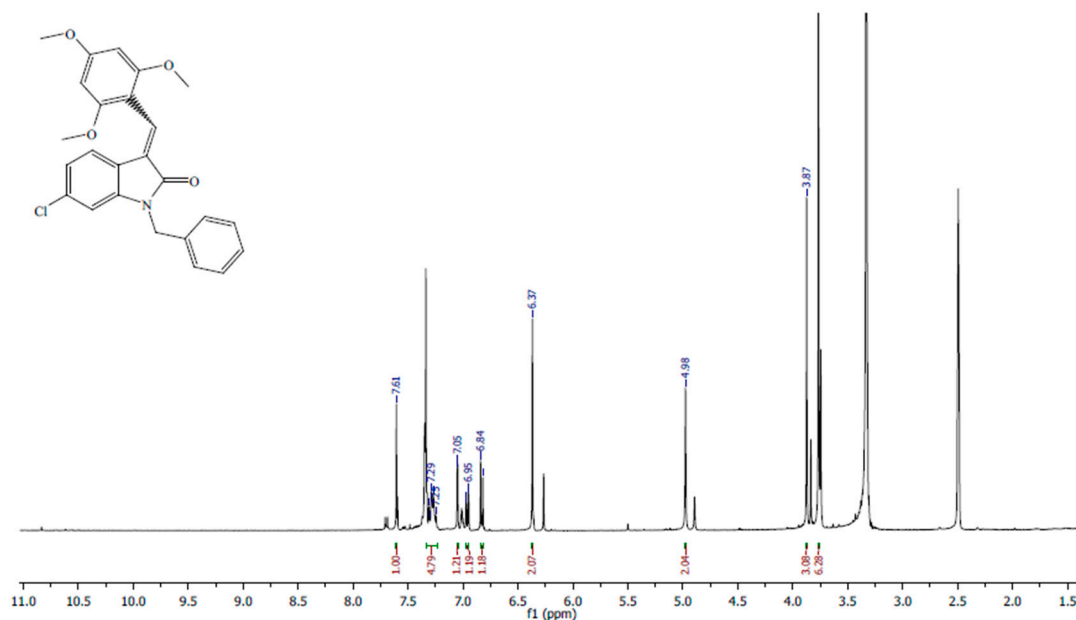

**Figure S37.**  $^1\text{H}$ -NMR spectrum of compound **7d** in  $\text{DMSO}-d_6$  at 400MHz.

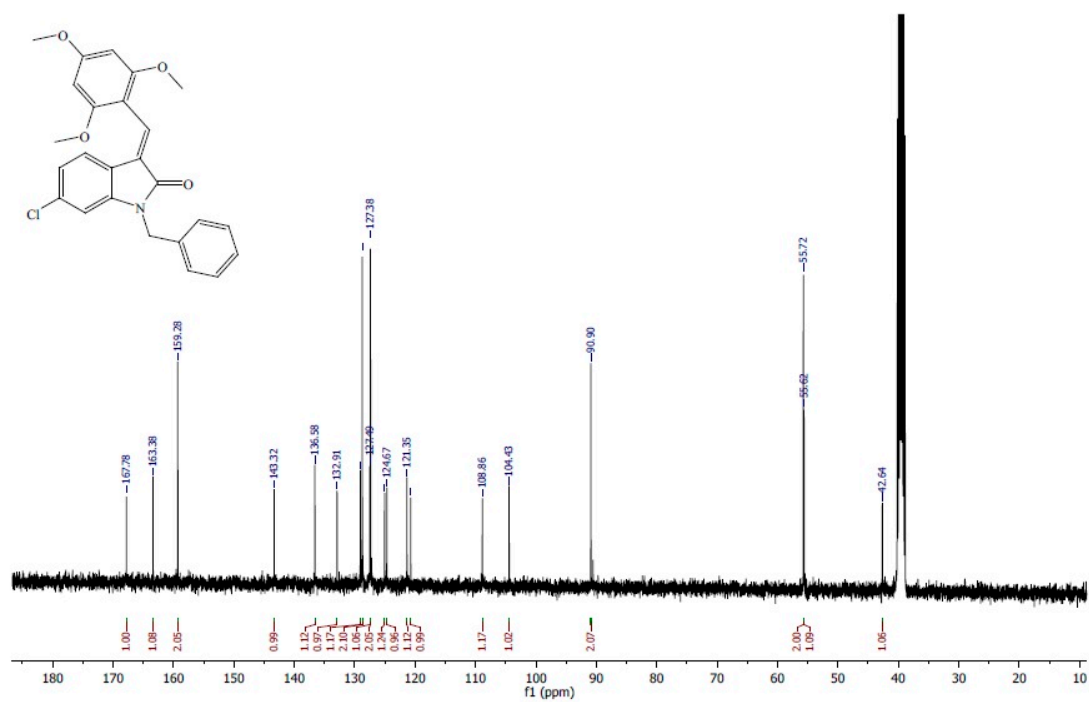

**Figure S38.** <sup>13</sup>C-NMR spectrum of compound **7d** in DMSO-*d*<sub>6</sub> at 100MHz.

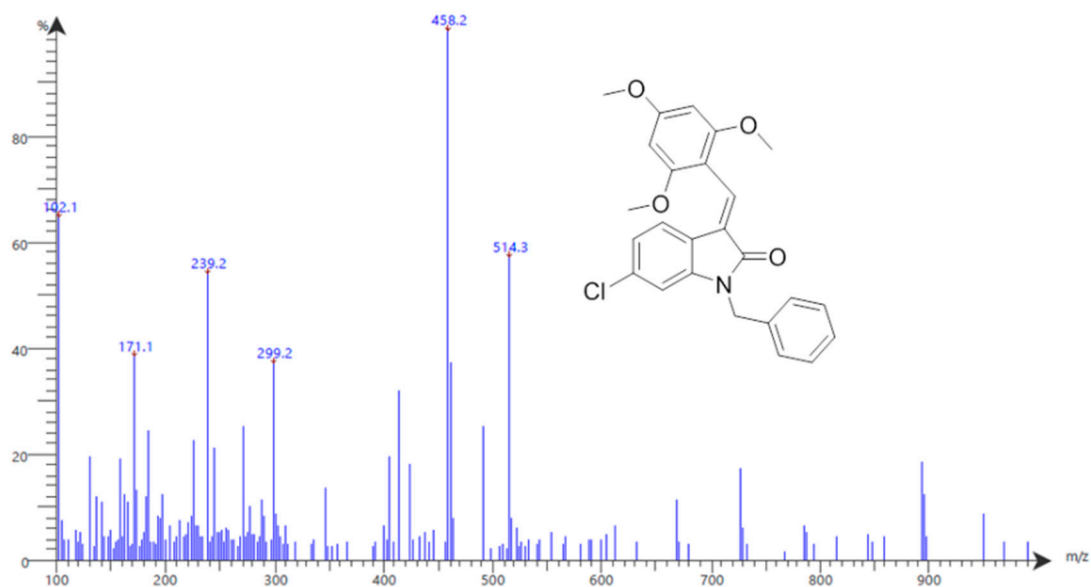

**Figure S39.** LC/MS spectrum of compound **7d**.

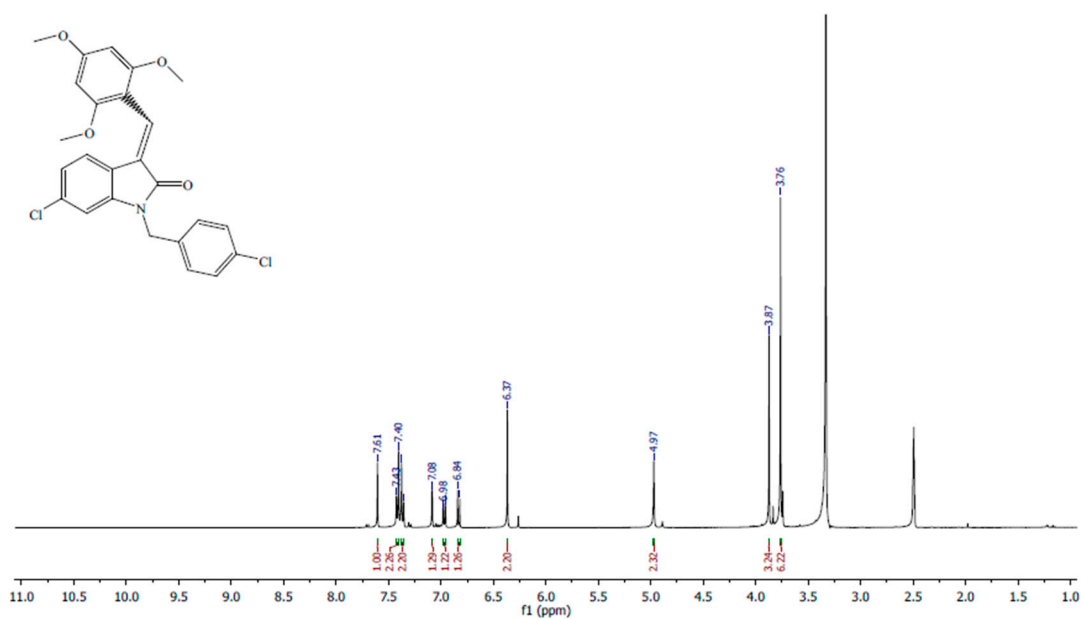

**Figure S40.**  $^1\text{H}$ -NMR spectrum of compound **7e** in  $\text{DMSO}-d_6$  at 400MHz.

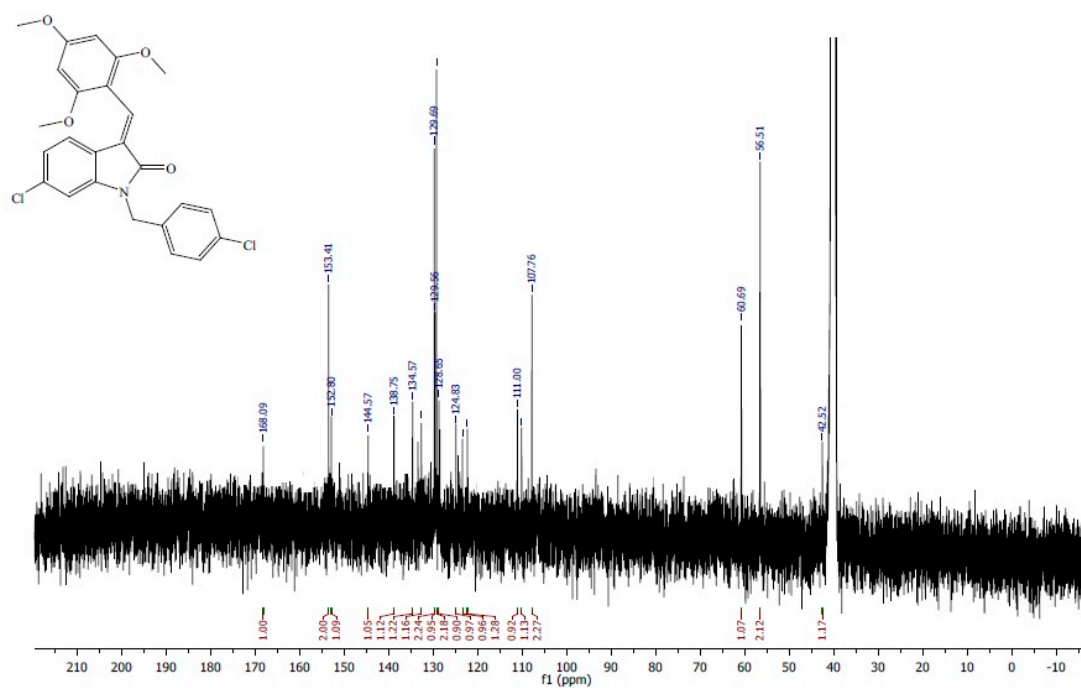

**Figure S41.**  $^{13}\text{C}$ -NMR spectrum of compound **7e** in  $\text{DMSO}-d_6$  at 100MHz.



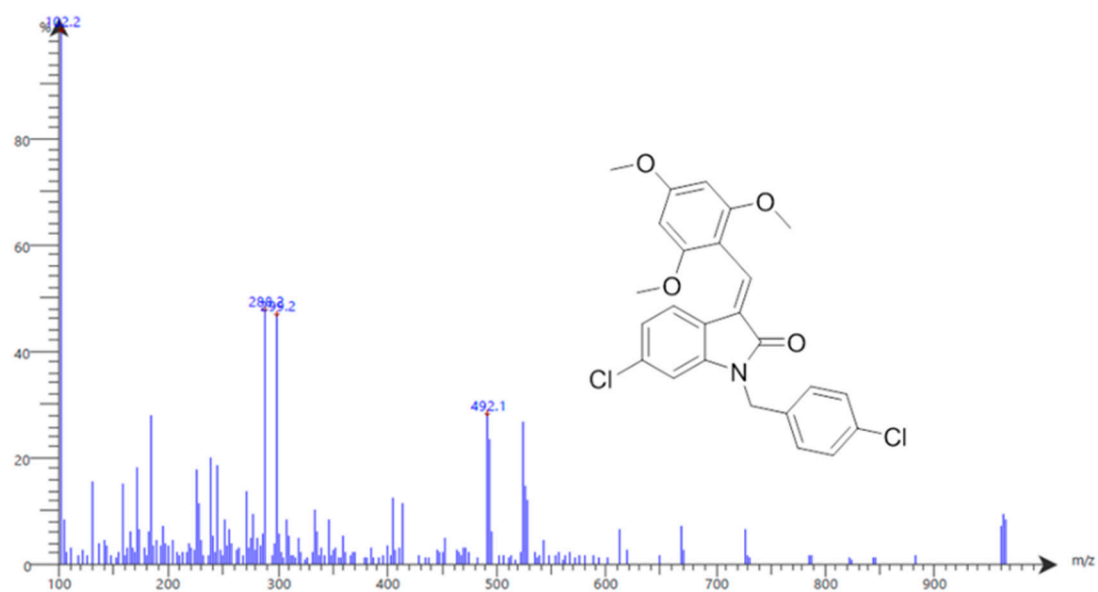

**Figure S42.** LC/MS spectrum of compound 7e.

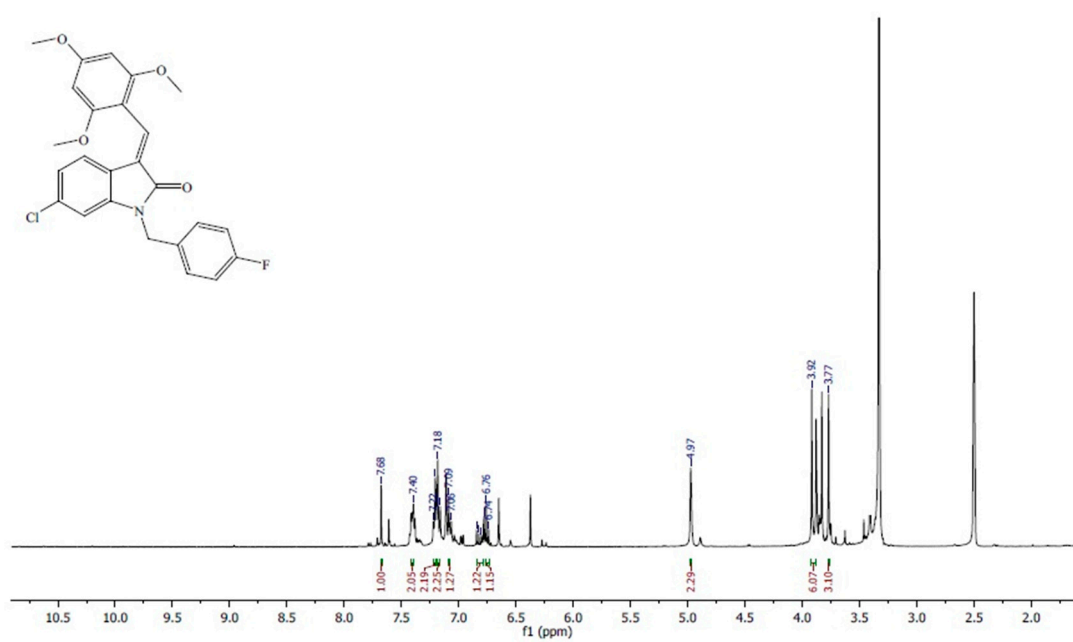

**Figure S43.** <sup>1</sup>H-NMR spectrum of compound 7f in DMSO-*d*<sub>6</sub> at 400MHz.

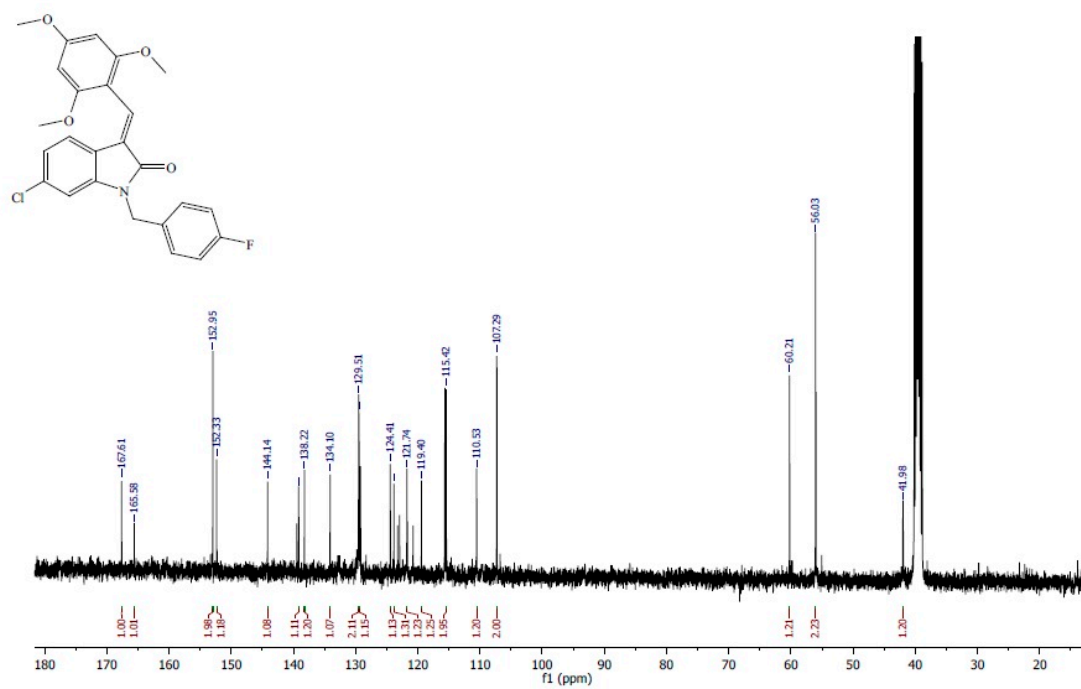

**Figure S44.** <sup>13</sup>C-NMR spectrum of compound **7f** in DMSO-*d*<sub>6</sub> at 100MHz.

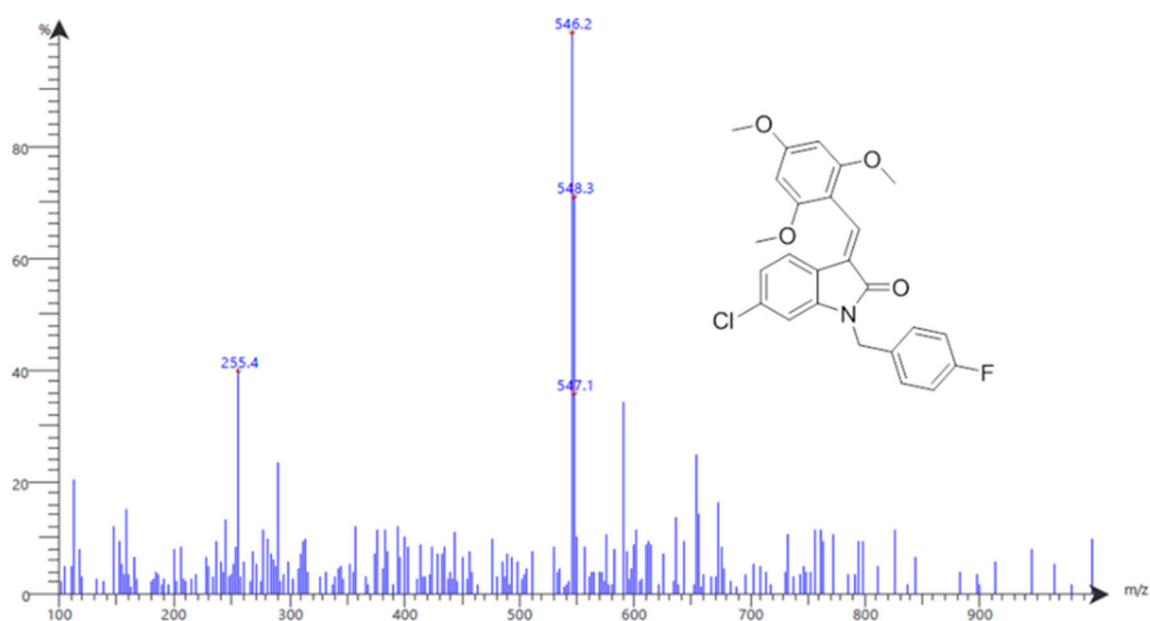

**Figure S45.** LC/MS spectrum of compound **7f**.

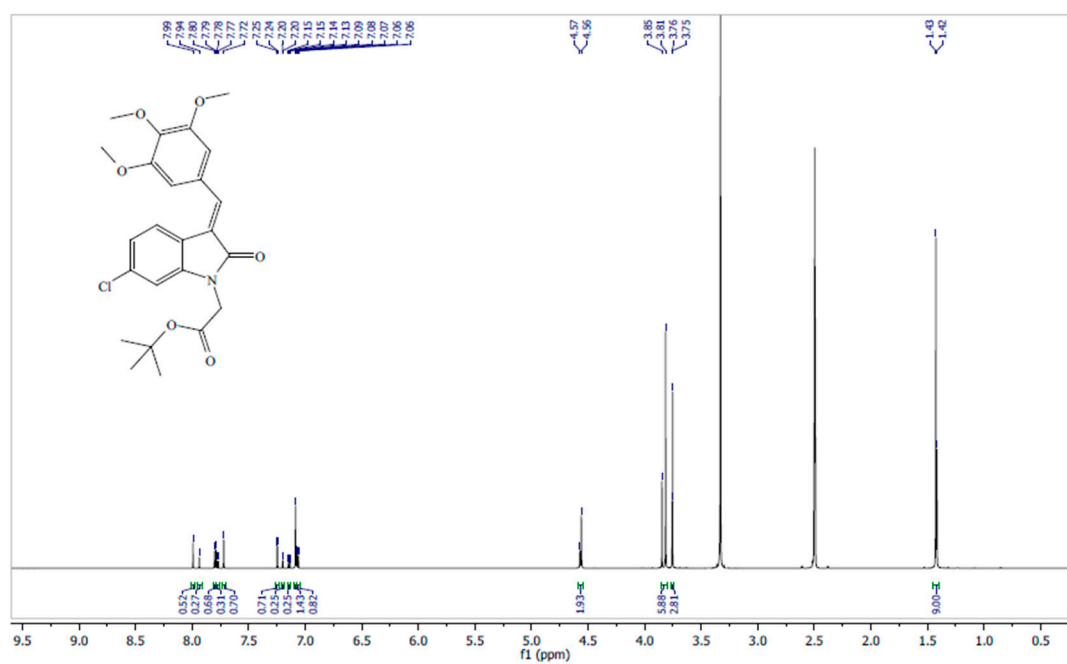

**Figure S46.** <sup>1</sup>H-NMR spectrum of compound **9a** in DMSO-*d*<sub>6</sub> at 400MHz.

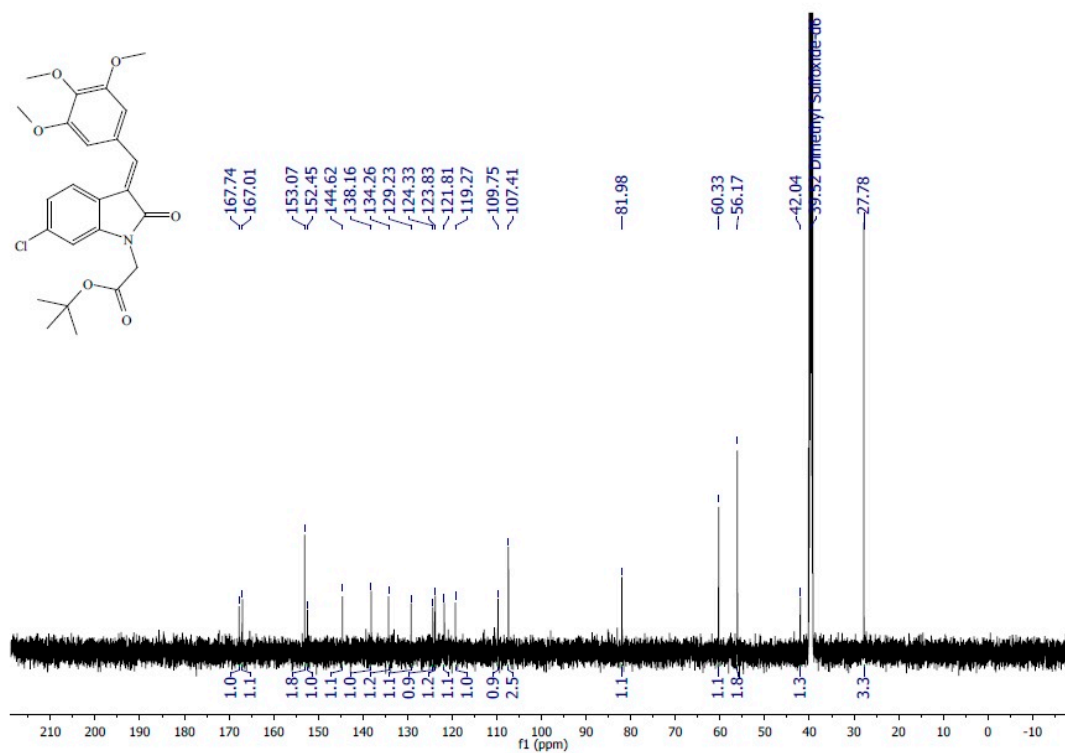

Figure S47. <sup>13</sup>C-NMR spectrum of compound 9a in DMSO-*d*<sub>6</sub> at 100MHz.

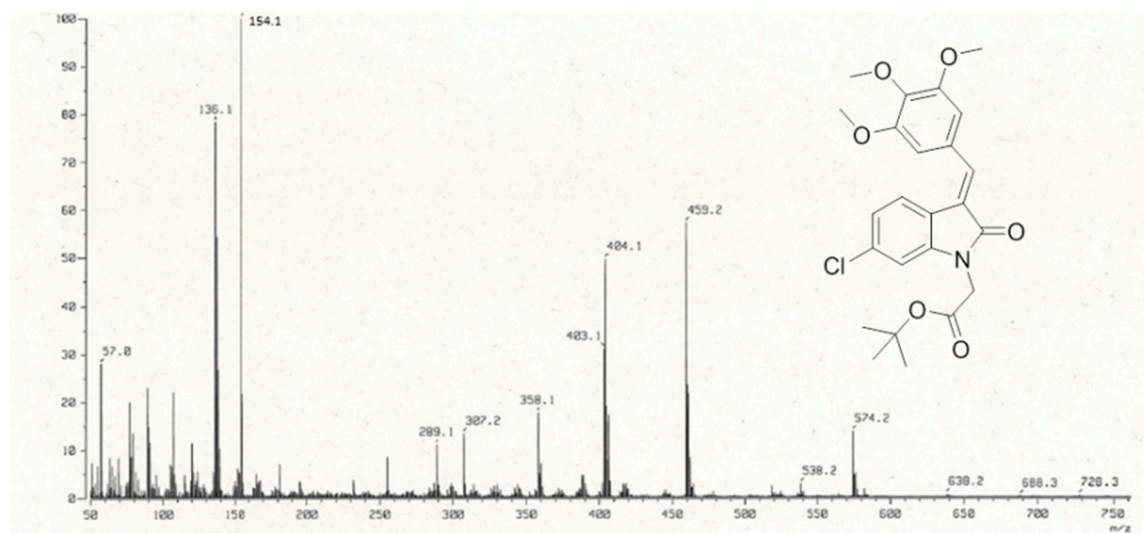

Figure S48. LC/MS spectrum of compound 9a.

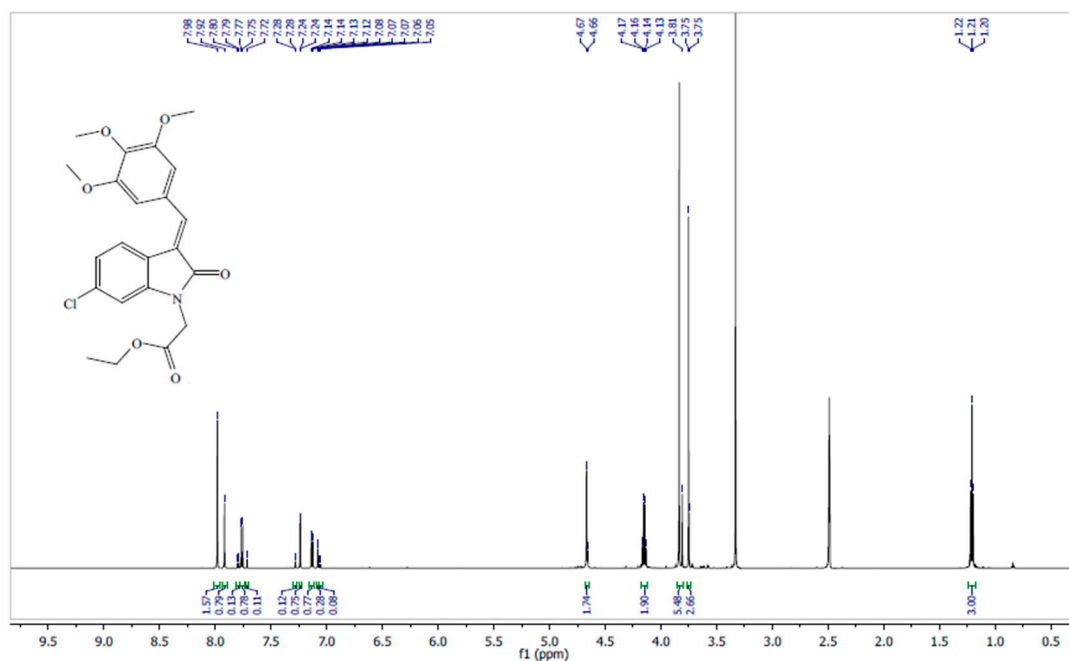

**Figure S49.** <sup>1</sup>H-NMR spectrum of compound **9b** in DMSO-*d*<sub>6</sub> at 400MHz.

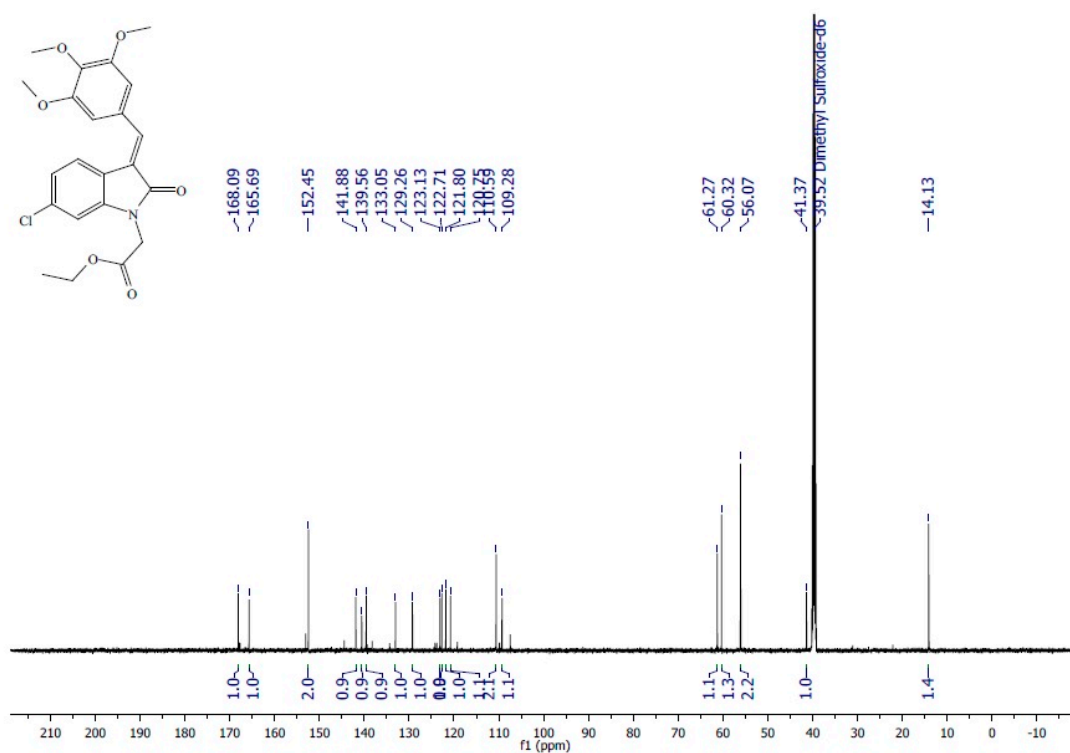

**Figure S50.** <sup>13</sup>C-NMR spectrum of compound **9b** in DMSO-*d*<sub>6</sub> at 100MHz.

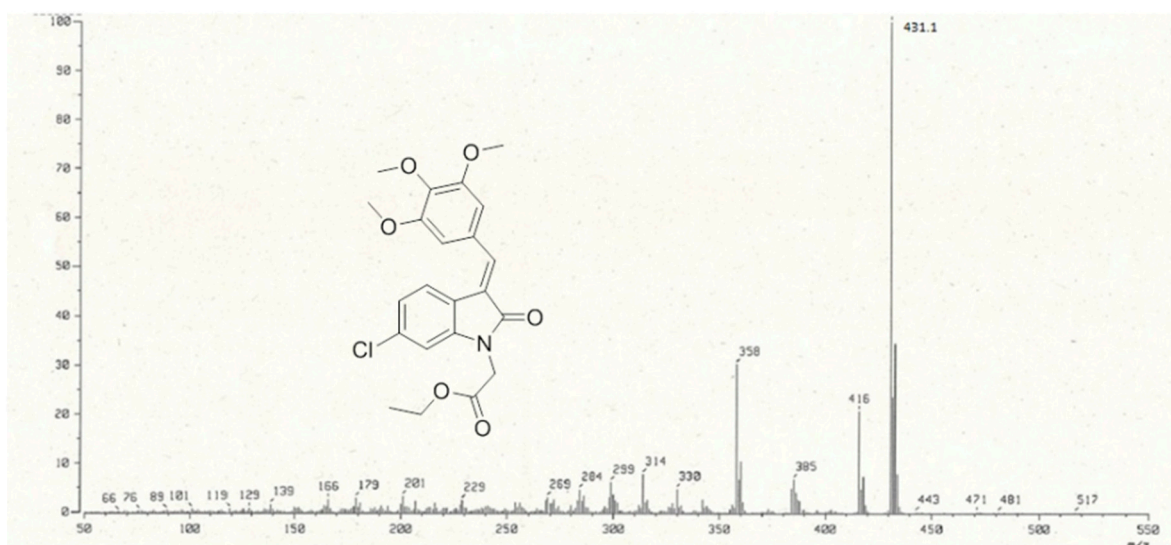

Figure S51. LC/MS spectrum of compound 9b.

## Detailed Results

Tub

| code                                                                                | IC50 | conc. | log | %inh | T2 | T1 | ΔT | RFU2  | RFU1 | ΔRFU  | slope  | K.Activity | EC  |
|-------------------------------------------------------------------------------------|------|-------|-----|------|----|----|----|-------|------|-------|--------|------------|-----|
| 4b                                                                                  |      | 100   | 2   | 91.7 | 30 | 0  | 30 | 1347  | 0    | 1347  | 539.47 | 9.98758    | 120 |
|  |      | 10    | 1   | 69.4 | 30 | 0  | 30 | 4955  | 0    | 4955  | 539.47 | 36.73976   | 120 |
|                                                                                     |      | 1     | 0   | 42.5 | 30 | 0  | 30 | 9303  | 0    | 9303  | 539.47 | 68.97881   | 120 |
|                                                                                     |      | 0.1   | -1  | 22.7 | 30 | 0  | 30 | 12517 | 0    | 12517 | 539.47 | 92.80961   | 120 |
|                                                                                     | EC   |       |     | 0    | 30 | 0  | 30 | 16184 | 0    | 16184 | 539.47 | 120        | 120 |
|                                                                                     |      |       |     |      |    |    |    |       |      |       |        |            |     |
| code                                                                                | IC50 | conc. | log | %inh | T2 | T1 | ΔT | RFU2  | RFU1 | ΔRFU  | slope  | K.Activity | EC  |
| CA4                                                                                 |      | 100   | 2   | 92.3 | 30 | 0  | 30 | 1161  | 0    | 1161  | 501.27 | 9.264468   | 120 |
|  |      | 10    | 1   | 75.8 | 30 | 0  | 30 | 3638  | 0    | 3638  | 501.27 | 29.03026   | 120 |
|                                                                                     |      | 1     | 0   | 54.5 | 30 | 0  | 30 | 6842  | 0    | 6842  | 501.27 | 54.59732   | 120 |
|                                                                                     |      | 0.1   | -1  | 39.8 | 30 | 0  | 30 | 9057  | 0    | 9057  | 501.27 | 72.27243   | 120 |
|                                                                                     | EC   |       |     | 0    | 30 | 0  | 30 | 15038 | 0    | 15038 | 501.27 | 120        | 120 |





|                      |                                                               |                                                                          |                  |
|----------------------|---------------------------------------------------------------|--------------------------------------------------------------------------|------------------|
| <b>Researcher</b>    | : Dr. Mohamed badr                                            | email : <a href="mailto:mohabadr180@gmail.com">mohabadr180@gmail.com</a> | mob. 01067157143 |
| <b>Assay</b>         | : Tubulin enzyme assay                                        |                                                                          |                  |
| <b>Samples</b>       | : 02 compounds                                                |                                                                          |                  |
| <b>Ref.</b>          | : ---                                                         |                                                                          |                  |
| <b>Date</b>          | : 28-09-2021                                                  |                                                                          |                  |
| <b>Reader</b>        | : Tecan-Spark reader                                          |                                                                          |                  |
| <b>Kit used</b>      | : Cloud-clone corp) SEB870Hu EIA Kit For Tubulin Beta (TUBb). |                                                                          |                  |
| <b>Solvent</b>       | : DMSO                                                        |                                                                          |                  |
| <b>Assay samples</b> | : ---                                                         |                                                                          |                  |

## Lab Report

| ser | Compound |              |      | Tubulin polymerization Inhibition | SD $\pm$ |
|-----|----------|--------------|------|-----------------------------------|----------|
|     | ID       | M.W<br>g/mol | conc | IC50<br>uM                        |          |
| 1   | 4a       | 311.12       |      | 5.045                             | 0.31     |
| 2   | CA-4     | 316.34       |      | 1.384                             | 0.09     |

**Figure S53.** Tubulin polymerization assay for compound 4a.

### Detailed results

| EGFR                                                                                |      |            |          |      |    |    |            |       |      |              |         |            |
|-------------------------------------------------------------------------------------|------|------------|----------|------|----|----|------------|-------|------|--------------|---------|------------|
| code                                                                                | IC50 | conc       | log      | %inh | T2 | T1 | $\Delta T$ | RFU2  | RFU1 | $\Delta RFU$ | slope   | K.Activity |
| 4e                                                                                  |      | 10         | 1        | 78   | 30 | 0  | 30         | 22.06 | 0    | 22.06        | 3.33333 | 26.47203   |
| 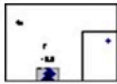 |      | 1          | 0        | 60   | 30 | 0  | 30         | 39.55 | 0    | 39.55        | 3.33333 | 47.46005   |
|                                                                                     |      | 0.1        | -1       | 33   | 30 | 0  | 30         | 67.25 | 0    | 67.25        | 3.33333 | 80.70008   |
|                                                                                     |      | 0.01       | -2       | 21   | 30 | 0  | 30         | 79.42 | 0    | 79.42        | 3.33333 | 95.3041    |
| EC                                                                                  |      |            |          | 0    | 30 | 0  | 30         | 100   | 0    | 100          | 3.33333 | 120        |
| EGFR                                                                                |      |            |          |      |    |    |            |       |      |              |         |            |
| code                                                                                | IC50 | conc.ng/ml | log conc | %inh | T2 | T1 | $\Delta T$ | RFU2  | RFU1 | $\Delta RFU$ | slope   | K.Activity |
| 4b                                                                                  |      | 10         | 1        | 88   | 30 | 0  | 30         | 11.51 | 0    | 11.51        | 3.33333 | 13.81201   |
|  |      | 1          | 0        | 69   | 30 | 0  | 30         | 31.42 | 0    | 31.42        | 3.33333 | 37.70404   |
|                                                                                     |      | 0.1        | -1       | 40   | 30 | 0  | 30         | 59.96 | 0    | 59.96        | 3.33333 | 71.95207   |
|                                                                                     |      | 0.01       | -2       | 23   | 30 | 0  | 30         | 77.13 | 0    | 77.13        | 3.33333 | 92.55609   |
| EC                                                                                  |      |            |          | 0    | 30 | 0  | 30         | 100   | 0    | 100          | 3.33333 | 120        |



| code                                                                              | IC50 | conc.ng/ml | log conc | %inh | T2 | T1 | ΔT | RFU2  | RFU1 | ΔRFU  | slope   | K.Activity |
|-----------------------------------------------------------------------------------|------|------------|----------|------|----|----|----|-------|------|-------|---------|------------|
| Gefitinib                                                                         |      | 10         | 1        | 93   | 30 | 0  | 30 | 7.39  | 0    | 7.39  | 3.33333 | 8.868009   |
|  |      | 1          | 0        | 82   | 30 | 0  | 30 | 18.34 | 0    | 18.34 | 3.33333 | 22.00802   |
|                                                                                   |      | 0.1        | -1       | 56   | 30 | 0  | 30 | 44.12 | 0    | 44.12 | 3.33333 | 52.94405   |
|                                                                                   |      | 0.01       | -2       | 32   | 30 | 0  | 30 | 68.13 | 0    | 68.13 | 3.33333 | 81.75608   |
|                                                                                   | EC   |            |          | 0    | 30 | 0  | 30 | 100   | 0    | 100   | 3.33333 | 120        |

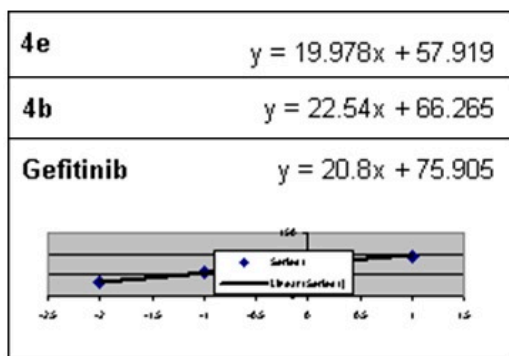

|            |                              |                                                                     |                  |
|------------|------------------------------|---------------------------------------------------------------------|------------------|
| Researcher | : Dr.Mohamed Ibrahim         | email: <a href="mailto:Mia06@fayoum.edu.eg">Mia06@fayoum.edu.eg</a> | mob. 01025727434 |
| Assay      | : EGFR inh.assay             |                                                                     |                  |
| Samples    | : 02 compounds               |                                                                     |                  |
| Cell lines | : ---                        |                                                                     |                  |
| Ref.       | : ---                        |                                                                     |                  |
| Date       | : 10-05-2021                 |                                                                     |                  |
| Reader     | : ROBONIK P2000 ELISA READER | w/ 450 nm                                                           |                  |
| Kit used   | : ---                        |                                                                     |                  |
| Solvent    | : DMSO                       |                                                                     |                  |

## Lab Report

| ser | Compound  |    |                | EGFR          | SD<br>± |
|-----|-----------|----|----------------|---------------|---------|
|     | code      | MW | conc.<br>ug/ml | IC50<br>ug/ml |         |
| 1   | 4e        |    |                | 0.401         | 0.008   |
| 2   | 4b        |    |                | 0.19          | 0.004   |
| 3   | Gefitinib |    |                | 0.057         | 0.001   |

**Figure S54.** Epidermal growth factor receptor (EGFR) inhibition assay for compound 4b.

## Detailed results

### EGFR

| code | IC50 | conc | log | %inh | T2 | T1 | ΔT | RFU2  | RFU1 | ΔRFU  | slope   | K.Activity | EC  |
|------|------|------|-----|------|----|----|----|-------|------|-------|---------|------------|-----|
| 4a   |      | 10   | 1   | 89   | 30 | 0  | 30 | 11.42 | 0    | 11.42 | 3.33333 | 13.70401   | 120 |
|      |      | 1    | 0   | 72   | 30 | 0  | 30 | 27.55 | 0    | 27.55 | 3.33333 | 33.06003   | 120 |
|      |      | 0.1  | -1  | 50   | 30 | 0  | 30 | 49.65 | 0    | 49.65 | 3.33333 | 59.58006   | 120 |
|      |      | 0.01 | -2  | 27   | 30 | 0  | 30 | 72.51 | 0    | 72.51 | 3.33333 | 87.01209   | 120 |
| EC   |      |      |     | 0    | 30 | 0  | 30 | 100   | 0    | 100   | 3.33333 | 120        | 120 |

  

| code | IC50 | conc.ng/ml | log conc | %inh | T2 | T1 | ΔT | RFU2  | RFU1 | ΔRFU  | slope   | K.Activity | EC  |
|------|------|------------|----------|------|----|----|----|-------|------|-------|---------|------------|-----|
| CMJ  |      | 10         | 1        | 93   | 30 | 0  | 30 | 6.56  | 0    | 6.56  | 3.33333 | 7.872008   | 120 |
|      |      | 1          | 0        | 83   | 30 | 0  | 30 | 17.02 | 0    | 17.02 | 3.33333 | 20.42402   | 120 |
|      |      | 0.1        | -1       | 59   | 30 | 0  | 30 | 41.05 | 0    | 41.05 | 3.33333 | 49.26005   | 120 |
|      |      | 0.01       | -2       | 36   | 30 | 0  | 30 | 63.95 | 0    | 63.95 | 3.33333 | 76.74008   | 120 |
| EC   |      |            |          | 0    | 30 | 0  | 30 | 100   | 0    | 100   | 3.33333 | 120        | 120 |

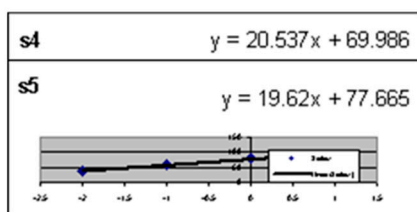

Researcher : Dr. Mohamed badr email : [mohabadr180@gmail.com](mailto:mohabadr180@gmail.com) mob. 01067157143  
 Assay : EGFR inh.assay  
 Samples : 02 compounds  
 Cell lines : ---  
 Ref. : ---  
 Date : 29-09-2021  
 Reader : Tecan Spark Reader  
 Kit used : ---  
 Solvent : DMSO

## Lab Report

| ser | Compound |        |                | EGFR       | SD<br>± |
|-----|----------|--------|----------------|------------|---------|
|     | code     | MW     | conc.<br>ug/ml | IC50<br>uM |         |
| 1   | 4a       | 311.12 |                | 0.106      | 0.0022  |
| 2   | CJM 126  | 226.30 |                | 0.039      | 0.0008  |

**Figure S55.** Epidermal growth factor receptor (EGFR) inhibition assay for compound 4a.

## Detailed results

| CK1                                                                               |      |            |          |       |    |    |    |       |      |       |        |            |     |
|-----------------------------------------------------------------------------------|------|------------|----------|-------|----|----|----|-------|------|-------|--------|------------|-----|
| code                                                                              | IC50 | conc       | log      | %inh  | T2 | T1 | ΔT | RFU2  | RFU1 | ΔRFU  | slope  | K.Activity | EC  |
| 4e                                                                                |      | 100        | 2        | 65.47 | 30 | 0  | 30 | 0.634 | 0    | 0.634 | 0.0612 | 41.4379    | 120 |
|                                                                                   |      | 10         | 1        | 48.15 | 30 | 0  | 30 | 0.952 | 0    | 0.952 | 0.0612 | 62.2222    | 120 |
|                                                                                   |      | 1          | 0        | 30.23 | 30 | 0  | 30 | 1.281 | 0    | 1.281 | 0.0612 | 83.7255    | 120 |
|                                                                                   |      | 0.1        | -1       | 12.64 | 30 | 0  | 30 | 1.604 | 0    | 1.604 | 0.0612 | 104.837    | 120 |
|                                                                                   | EC   |            |          | 0     | 30 | 0  | 30 | 1.836 | 0    | 1.836 | 0.0612 | 120        | 120 |
| 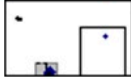 |      |            |          |       |    |    |    |       |      |       |        |            |     |
| code                                                                              | IC50 | conc.ng/ml | log conc | %inh  | T2 | T1 | ΔT | RFU2  | RFU1 | ΔRFU  | slope  | K.Activity | EC  |
| 4b                                                                                |      | 100        | 2        | 88.62 | 30 | 0  | 30 | 0.209 | 0    | 0.209 | 0.0612 | 13.6601    | 120 |
|                                                                                   |      | 10         | 1        | 69.99 | 30 | 0  | 30 | 0.551 | 0    | 0.551 | 0.0612 | 36.0131    | 120 |
|                                                                                   |      | 1          | 0        | 35.62 | 30 | 0  | 30 | 1.182 | 0    | 1.182 | 0.0612 | 77.2549    | 120 |
|                                                                                   |      | 0.1        | -1       | 25.16 | 30 | 0  | 30 | 1.374 | 0    | 1.374 | 0.0612 | 89.8039    | 120 |
|                                                                                   | EC   |            |          | 0     | 30 | 0  | 30 | 1.836 | 0    | 1.836 | 0.0612 | 120        | 120 |
|  |      |            |          |       |    |    |    |       |      |       |        |            |     |

| code                                                                                | IC50 | conc.ng/ml | log conc | %inh  | T2 | T1 | ΔT | RFU2  | RFU1 | ΔRFU  | slope  | K.Activity | EC  |
|-------------------------------------------------------------------------------------|------|------------|----------|-------|----|----|----|-------|------|-------|--------|------------|-----|
| IC261                                                                               |      | 100        | 2        | 85.59 | 30 | 0  | 30 | 0.287 | 0    | 0.287 | 0.0664 | 17.2892    | 120 |
|                                                                                     |      | 10         | 1        | 61.7  | 30 | 0  | 30 | 0.763 | 0    | 0.763 | 0.0664 | 45.9639    | 120 |
|                                                                                     |      | 1          | 0        | 36.8  | 30 | 0  | 30 | 1.259 | 0    | 1.259 | 0.0664 | 75.8434    | 120 |
|                                                                                     |      | 0.1        | -1       | 25.9  | 30 | 0  | 30 | 1.476 | 0    | 1.476 | 0.0664 | 88.9157    | 120 |
|                                                                                     | EC   |            |          | 0     | 30 | 0  | 30 | 1.993 | 0    | 1.993 | 0.0664 | 120        | 120 |
|  |      |            |          |       |    |    |    |       |      |       |        |            |     |

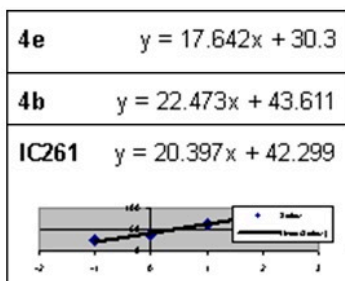

|            |                                                                        |
|------------|------------------------------------------------------------------------|
| Researcher | : <u>Dr. Mohamed Ibrahim</u> email: Mia06@fayoum.edu.egmob.01025727434 |
| Assay      | : CK1 assay                                                            |
| Samples    | : 02 compounds                                                         |
| Cell lines | : ---                                                                  |
| Ref.       | : ---                                                                  |
| Date       | : 20-05-2021                                                           |
| Reader     | : ROBONIK P2000 ELISA READER <u>wl</u> 450 nm                          |
| Kit used   | : ---                                                                  |
| Solvent    | : DMSO                                                                 |

### Lab Report

| <u>ser</u> | Compound |    |                       | Casein kinase I<br>CK1 | SD<br>± |
|------------|----------|----|-----------------------|------------------------|---------|
|            | code     | MW | conc.<br><u>ug/ml</u> | IC50<br><u>ug/ml</u>   |         |
| 1          | 4e       |    |                       | 13.08                  | 0.66    |
| 2          | 4b       |    |                       | 1.92                   | 0.09    |
| 3          | IC261    |    |                       | 2.385                  | 0.12    |

**Figure S56.** Casein kinase I (CK1) inhibition assay

detailed  
results

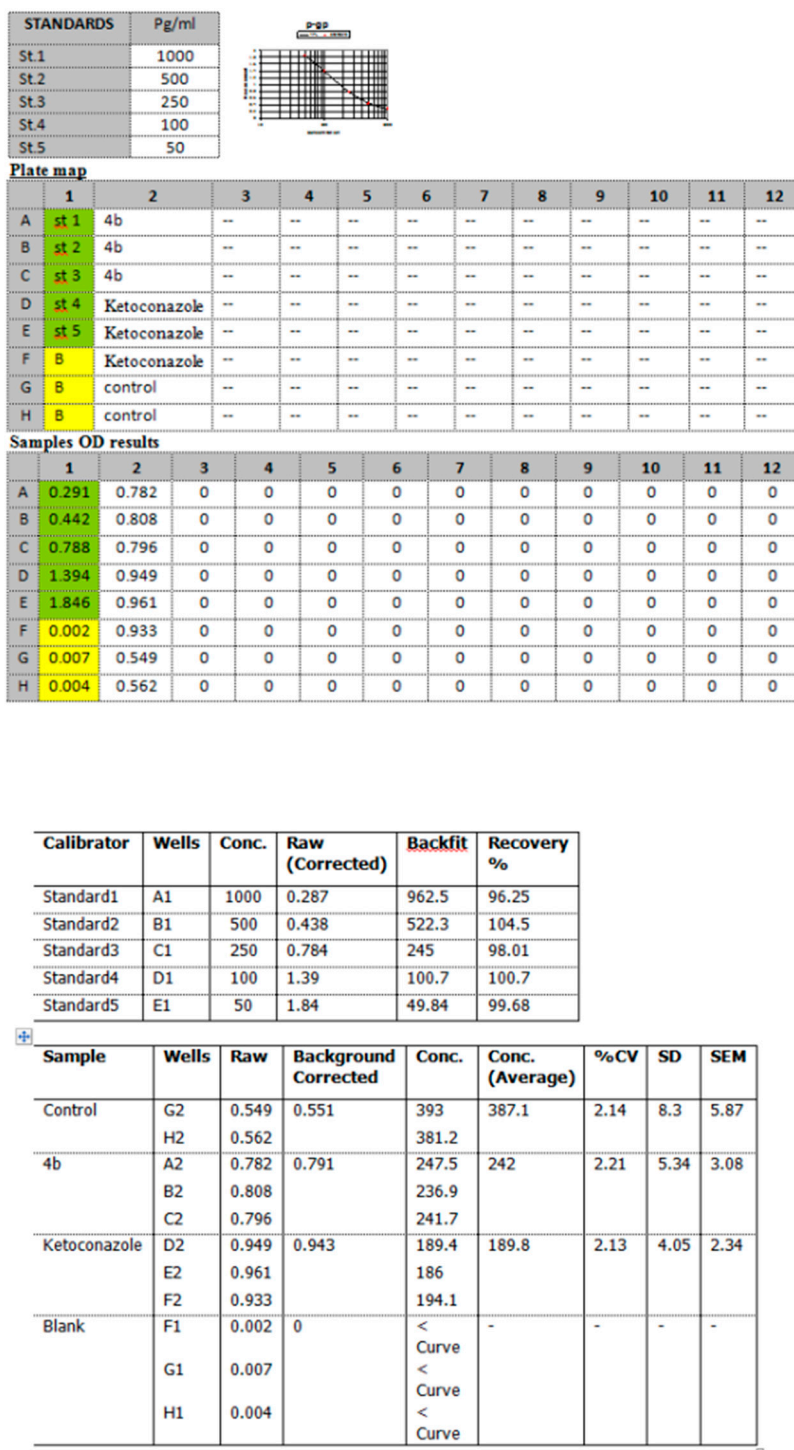

Figure S57. P-gp substrate assay.

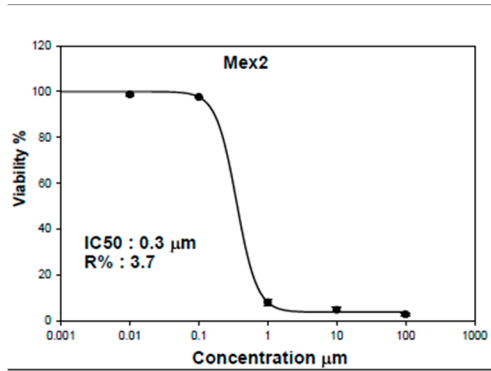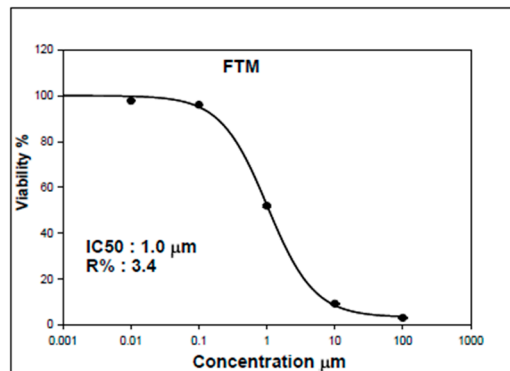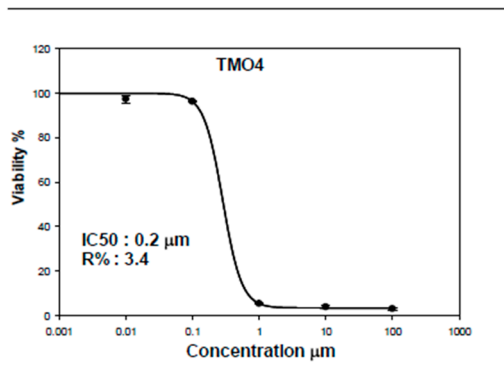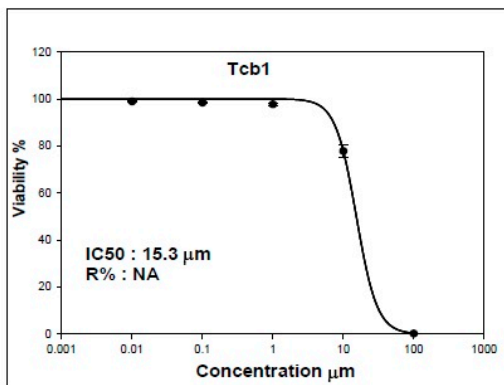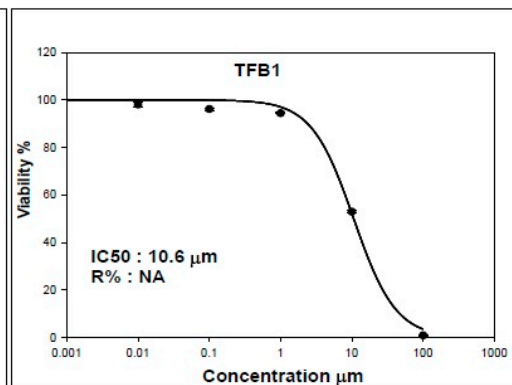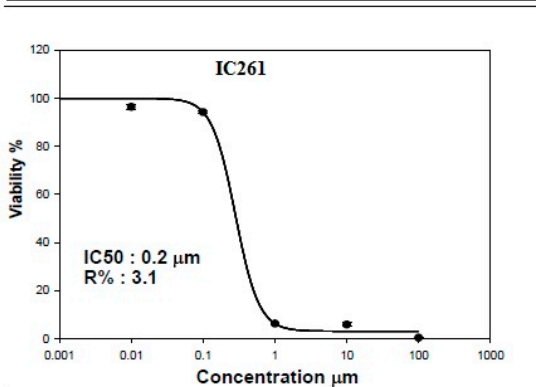

**Figure S58.** IC<sub>50</sub> of compounds **4a** (IC<sub>261</sub>), **4b**, **4d**, **4e**, **6e** and **6f** against COLO-205 using SRB assay.

|            |                          |                                                                         |                  |
|------------|--------------------------|-------------------------------------------------------------------------|------------------|
| Researcher | : Dr. Mohamed badr       | email: <a href="mailto:mohabadr180@gmail.com">mohabadr180@gmail.com</a> | mob. 01067157143 |
| Assay      | : MTT cytotoxicity assay |                                                                         |                  |
| Samples    | : 01 compound.           |                                                                         |                  |
| Cell lines | : ----                   |                                                                         |                  |
| Ref.       | : ----                   |                                                                         |                  |
| Date       | : 17-10-2021             |                                                                         |                  |
| Reader     | : BIOLINE ELIZA READER   | wl 450 nm                                                               |                  |
| Kit used   | : SIGMA chemicals        |                                                                         |                  |
| Solvent    | : DMSO                   |                                                                         |                  |

### Lab Report

\*Cytotoxicity results

| Ser | Sample      |              | cytotoxicity<br>IC <sub>50</sub><br>uM | SD<br>±     |
|-----|-------------|--------------|----------------------------------------|-------------|
|     | code        | M.W<br>g/mol | A549                                   |             |
| 1   | <b>4a</b>   | 311.12       | <b>28.4</b>                            | <b>1.52</b> |
| 2   | <b>4b</b>   | 345.08       | <b>9.5</b>                             | <b>0.51</b> |
| *** | <b>5-FU</b> | 130.078      | <b>15.6</b>                            | <b>0.83</b> |

**Figure S59.** Cytotoxicity assay and IC<sub>50</sub> of compounds **4a**, **4b** and **5-FU** against A549 cell line.

### **Cell culture Protocol**

Cell Line cells were obtained from American Type Culture Collection , cells were cultured using DMEM (Invitrogen/Life Technologies) supplemented with 10% FBS (Hyclone), 10 ug/ml of insulin (Sigma), and 1% penicillin-streptomycin. All of the other chemicals and reagents were from Sigma, or Invitrogen.

Plate cells (cells density  $1.2 - 1.8 \times 10,000$  cells/well) in a volume of 100µl complete growth medium + 100 ul of the tested compound per well in a 96-well plate for 24 hours before the MTT assay .

### **Cell culture protocol**

1. Remove culture medium to a centrifuge tube.
2. Briefly rinse the cell layer with 0.25% (w/v) Trypsin 0.53 mM EDTA solution to remove all traces of serum which contains Trypsin inhibitor.
3. Add 2.0 to 3.0 ml of Trypsin EDTA solution to flask and observe cells under an inverted microscope until cell layer is dispersed (usually within 5 to 15 minutes).

Note: To avoid clumping do not agitate the cells by hitting or shaking the flask while waiting for the cells to detach. Cells that are difficult to detach may be placed at 37°C to facilitate dispersal.

4. Add 6.0 to 8.0 mL of complete growth medium and aspirate cells by gently pipetting.
5. Transfer the cell suspension to the centrifuge tube with the medium and cells from step 1, and centrifuge at approximately 125 xg for 5 to 10 minutes. Discard the supernatant.
6. Resuspend the cell pellet in fresh growth medium. Add appropriate aliquots of the cell suspension to new culture vessels.
7. Incubate cultures at 37°C for 24 hrs.
- 8-After treatment of cells with the serial concentrations of the compound to be tested incubation is carried out for 48 h at 37°C ,then the plates are to be examined under the inverted microscope and proceed for the MTT assay



## **MTT – Cytotoxicity assay protocol**

The MTT method of monitoring in vitro cytotoxicity is

well suited for use with multiwell plates. For best results, cells in the log phase of growth should be employed and final cell number should not exceed 106 cells/cm<sup>2</sup>. Each test should include a blank containing complete medium without cells.

1. Remove cultures from incubator into laminar flow hood or other sterile work area.
2. Reconstitute each vial of MTT [M-5655] to be used with 3 ml of medium or balanced salt solution without phenol red and serum. Add reconstituted MTT in an amount equal to 10% of the culture medium volume.
3. Return cultures to incubator for 2-4 hours depending on cell type and maximum cell density. (An incubation period of 2 hours is generally adequate but may be lengthened for low cell densities or cells with lower metabolic activity.) Incubation times should be consistent when making comparisons.
4. After the incubation period, remove cultures from incubator and dissolve the resulting formazan crystals by adding an amount of MTT Solubilization Solution [M-8910] equal to the original culture medium volume.
5. Gentle mixing in a gyratory shaker will enhance dissolution. Occasionally, especially in dense cultures, pipetting up and down [trituration] may be required to completely dissolve the MTT formazan crystals.
6. Spectrophotometrically measure absorbance at a wavelength of 570 nm. Measure the background absorbance of multiwell plates at 690 nm and subtract from the 450 nm measurement. Tests performed in multiwell plates can be read using the appropriate type of plate reader or the contents of individual wells may be transferred to appropriate size cuvetts for spectrophotometric measurement.

researcher

assay

Date

cells

Dr. Moh. Badr

MTT

17-Oct

A549

|   | Blank | CC | Sample No. 4a/A549 |      |       |       |       | Sample No. 4b/A549 |      |       |       |       |
|---|-------|----|--------------------|------|-------|-------|-------|--------------------|------|-------|-------|-------|
|   | 1     | 2  | 3                  | 4    | 5     | 6     | 7     | 8                  | 9    | 10    | 11    | 12    |
| A | B     | C  | 100uM              | 25uM | 6.3uM | 1.6uM | 0.4uM | 100uM              | 25uM | 6.3uM | 1.6uM | 0.4uM |
| B | B     | C  | 100uM              | 25uM | 6.3uM | 1.6uM | 0.4uM | 100uM              | 25uM | 6.3uM | 1.6uM | 0.4uM |
| C | B     | C  | 100uM              | 25uM | 6.3uM | 1.6uM | 0.4uM | 100uM              | 25uM | 6.3uM | 1.6uM | 0.4uM |

ROBONIK P2000 Eia reader

Wave length: 450 nm

Reference: 630nm

|      | 1 | 2     | 3      | 4      | 5      | 6      | 7      | 8      | 9     | 10     | 11    | 12     |
|------|---|-------|--------|--------|--------|--------|--------|--------|-------|--------|-------|--------|
| A    | 0 | 0.549 | 0.215  | 0.288  | 0.339  | 0.402  | 0.454  | 0.167  | 0.245 | 0.298  | 0.343 | 0.379  |
| B    | 0 | 0.533 | 0.203  | 0.283  | 0.347  | 0.392  | 0.462  | 0.172  | 0.237 | 0.303  | 0.346 | 0.388  |
| C    | 0 | 0.561 | 0.217  | 0.292  | 0.345  | 0.398  | 0.457  | 0.178  | 0.242 | 0.306  | 0.352 | 0.394  |
| mean | 0 | 0.548 | 0.2117 | 0.2877 | 0.3437 | 0.3973 | 0.4577 | 0.1723 | 0.241 | 0.3023 | 0.347 | 0.387  |
| %    |   |       | 38.649 | 52.526 | 62.751 | 72.55  | 83.567 | 31.467 | 44.07 | 55.204 | 63.36 | 70.663 |

4a/A549

| log conc. | % viability |
|-----------|-------------|
| 2         | 38.6        |
| 1.398     | 52.5        |
| 0.796     | 62.8        |
| 0.193     | 72.6        |
| -0.41     | 83.6        |

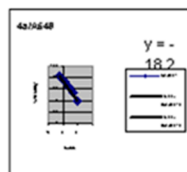

4b/A549

| log conc. | % viability |
|-----------|-------------|
| 2         | 31.47       |
| 1.3979    | 44.07       |
| 0.7959    | 55.2        |
| 0.1931    | 63.36       |
| -0.409    | 70.66       |

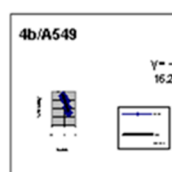

IC50=

IC50=

|   | Blank | CC | Sample No. 5-FU/A549 |      |       |       |       | Sample No. |   |    |    |    |
|---|-------|----|----------------------|------|-------|-------|-------|------------|---|----|----|----|
|   | 1     | 2  | 3                    | 4    | 5     | 6     | 7     | 8          | 9 | 10 | 11 | 12 |
| A | B     | C  | 100uM                | 25uM | 6.3uM | 1.6uM | 0.4uM |            |   |    |    |    |
| B | B     | C  | 100uM                | 25uM | 6.3uM | 1.6uM | 0.4uM |            |   |    |    |    |
| C | B     | C  | 100uM                | 25uM | 6.3uM | 1.6uM | 0.4uM |            |   |    |    |    |

ROBONIK P2000 Eia reader

Wave length: 450 nm

Reference: 630nm

|             | 1 | 2     | 3      | 4      | 5      | 6      | 7      | 8 | 9 | 10 | 11 | 12 |
|-------------|---|-------|--------|--------|--------|--------|--------|---|---|----|----|----|
| A           | 0 | 0.488 | 0.178  | 0.228  | 0.272  | 0.324  | 0.367  |   |   |    |    |    |
| B           | 0 | 0.475 | 0.193  | 0.236  | 0.279  | 0.308  | 0.356  |   |   |    |    |    |
| C           | 0 | 0.505 | 0.184  | 0.234  | 0.265  | 0.319  | 0.358  |   |   |    |    |    |
| mean        | 0 | 0.489 | 0.185  | 0.2327 | 0.272  | 0.317  | 0.3603 | 0 | 0 | 0  | 0  | 0  |
| % viability |   |       | 37.807 | 47.548 | 55.586 | 64.782 | 73.638 | 0 | 0 | 0  | 0  | 0  |

5-FU/A549

| log conc. | % viability |
|-----------|-------------|
| 2         | 37.8        |
| 1.398     | 47.5        |
| 0.796     | 55.6        |
| 0.193     | 64.8        |
| -0.41     | 73.6        |

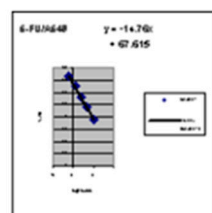

| log conc. | % viability |
|-----------|-------------|
| 2         | 0           |
| 1.3979    | 0           |
| 0.7959    | 0           |
| 0.1931    | 0           |
| -0.409    | 0           |

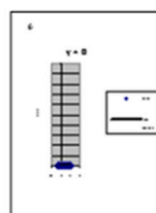

IC50=

IC50=

**Figure S60.** Raw data of cytotoxicity assay and IC<sub>50</sub> of compounds **4a**, **4b** and **5-FU** against A549 cell line.

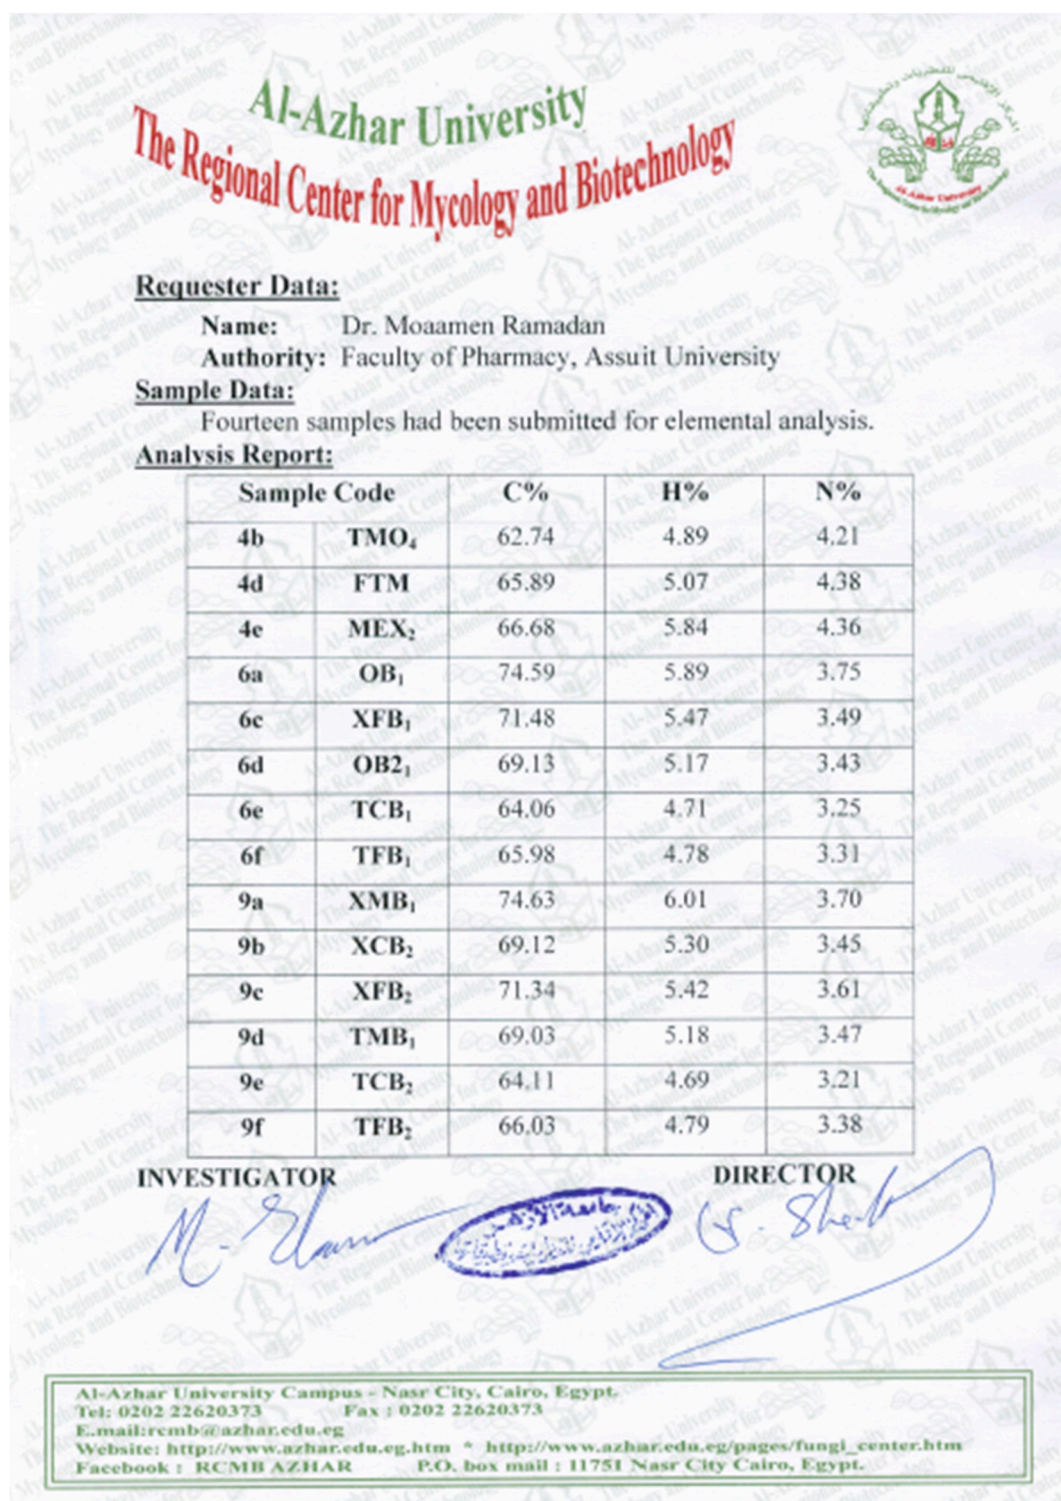

**Figure S61.** elemental analysis data.
